# Supplementary material for: Experiences of leaders in the implementation of Lean in a teaching hospital—barriers and facilitators in clinical practices: a qualitative study
Source: PubMed Central journal article supplement — BMJ Open. 2013 Oct 29;3(10):e003605. doi: 10.1136/bmjopen-2013-003605 (PMC3816237; doi:10.1136/bmjopen-2013-003605), 2013-10-29

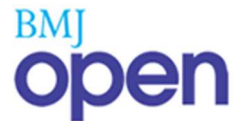

## Experiences of Leaders in the Implementation of Lean in a Teaching Hospital: Barriers and Facilitators in Clinical Practices

|                                                                                                                                                                                           |                                                                                                                                                                                                                                                                                                                                                                   |
|-------------------------------------------------------------------------------------------------------------------------------------------------------------------------------------------|-------------------------------------------------------------------------------------------------------------------------------------------------------------------------------------------------------------------------------------------------------------------------------------------------------------------------------------------------------------------|
| Journal:                                                                                                                                                                                  | <i>BMJ Open</i>                                                                                                                                                                                                                                                                                                                                                   |
| Manuscript ID:                                                                                                                                                                            | bmjopen-2013-003605                                                                                                                                                                                                                                                                                                                                               |
| Article Type:                                                                                                                                                                             | Research                                                                                                                                                                                                                                                                                                                                                          |
| Date Submitted by the Author:                                                                                                                                                             | 17-Jul-2013                                                                                                                                                                                                                                                                                                                                                       |
| Complete List of Authors:                                                                                                                                                                 | Aij, Kjeld; VU University Medical Center, Anesthesiology and Operative Care<br>Simons, Frederique; VU University Medical Center, Quality Improvement in Patient Care<br>Widdershoven, Guy; VU University Medical Center, EMGO+ Institute for health and Care Research<br>Visse, Merel; VU University Medical Center, EMGO+ Institute for health and Care Research |
| <b>Primary Subject Heading</b>:                                                                                                                                                           | Medical management                                                                                                                                                                                                                                                                                                                                                |
| Secondary Subject Heading:                                                                                                                                                                | Medical education and training                                                                                                                                                                                                                                                                                                                                    |
| Keywords:                                                                                                                                                                                 | Change management < HEALTH SERVICES ADMINISTRATION & MANAGEMENT, Quality in health care < HEALTH SERVICES ADMINISTRATION & MANAGEMENT, MEDICAL EDUCATION & TRAINING                                                                                                                                                                                               |
| <p>Note: The following files were submitted by the author for peer review, but cannot be converted to PDF. You must view these files (e.g. movies) online.</p> <p>AJE certificate.pdf</p> |                                                                                                                                                                                                                                                                                                                                                                   |

SCHOLARONE™  
Manuscripts

1  
2  
3 **Title: Experiences of Leaders in the Implementation of Lean in a Teaching Hospital: Barriers**  
4 **and Facilitators in Clinical Practices**  
5

6  
7 **KH Aij, MBA, FE Simons, MSc, GAM Widdershoven, M Visse**  
8

9  
10 Kjeld Harald Aij MBA  
11 VU University Medical Center  
12 Department of Anaesthesiology & Operative Care  
13 De Boelelaan 1117 (6A12)  
14 1081 HV AMSTERDAM  
15 The Netherlands  
16 e-mail: [k.ajj@vumc.nl](mailto:k.ajj@vumc.nl)  
17 tel: +31204442156  
18

19  
20 Frederique Elisabeth Simons MSc  
21 VU University Medical Center  
22 Department for Quality Improvement in Patient Care  
23 De Boelelaan 1117 (6A12)  
24 1081 HV AMSTERDAM  
25 The Netherlands  
26 [f.simons@vumc.nl](mailto:f.simons@vumc.nl)  
27

28  
29 Prof. dr. Guy A.M. Widdershoven  
30 VU University Medical Center, EMGO+ Institute for Health and Care Research, Department of  
31 Medical Humanities  
32 Van der Boechorstraat 7  
33 1081 BT Amsterdam  
34 The Netherlands  
35 [g.widdershoven@vumc.nl](mailto:g.widdershoven@vumc.nl)  
36

37  
38 Dr. Merel Visse  
39 VU University Medical Center, EMGO+ Institute for Health and Care Research, Department of  
40 Medical Humanities  
41 Van der Boechorstraat 7  
42 1081 BT Amsterdam  
43 The Netherlands  
44 [m.visse@vumc.nl](mailto:m.visse@vumc.nl)  
45

46  
47 Keywords: lean, barriers, facilitators, training, implementation  
48

49  
50 Word count: 3.599 (tables excluded)  
51  
52  
53  
54  
55  
56  
57  
58  
59  
60

**Abstract****Objectives**

To date, experiences of leaders in the implementation of lean after a lean training programme have not been systematically investigated within teaching hospitals. Existing studies have identified barriers and facilitators only from an improvement programme perspective and have not considered the meaning of leadership for participants. This study aims to bridge this gap.

**Design**

Semi-structured, in-depth interviews.

**Setting**

One of largest teaching hospitals in the Netherlands.

**Participants**

31 medical, surgical, and nursing professionals with an average of 19.2 years of supervisory experience. All professionals were appointed to a Lean Training Programme and were directly involved in the implementation of lean.

**Results**

The evidence obtained in this study shows that leadership management support, a continuous learning environment, and cross-departmental cooperation play a significant role in successful lean implementation. The results suggest that a lean training programme contributed to positive outcomes in personal and professional skills that were evident during the first four months after programme completion.

**Conclusion**

Implementing lean in a teaching hospital setting is a challenge because of the ambiguous and complex environment of a highly professionalised organisation. The study found that leadership management support and a continuous learning environment are important facilitators of lean implementation. To increase the successful outcomes of leadership actions, training should be supplemented with actions to remove perceived barriers. This requires the involvement of all professionals, the crossing of departmental boundaries and a focus on meaning-making processes rather than simply 'implementing' facts. Therefore, this research suggests that programme participants, such as staff members and leaders, can mutually explore the meanings of lean thinking and working for their own contexts. By entering this shared learning process (e.g., learning on the job) the ownership of lean implementation could also increase.

## Article Summary

### Article focus

- To investigate experiences of leaders in the implementation of lean after a lean training programme within teaching hospitals
- To provide further insight into the barriers and facilitators that may be encountered when implementing lean within a clinical practice.

### Key messages

- The study found that leadership management support and a continuous learning environment are important facilitators of lean implementation.
- The successful implementation of lean actions by leaders requires the involvement of all professionals, the crossing of departmental boundaries and a focus on meaning-making processes rather than simply 'implementing' facts.
- To increase the successful outcomes of leadership actions, training should be supplemented with actions to remove perceived barriers, most of which are related to the organisational and social context of leaders.

### Strengths and limitations of this study

- We acquired detailed records of leader experiences in clinical practices
- This was a qualitative study whose purpose was to explore experiences of leaders in the implementation of lean in a teaching hospital; further multiple-centre studies are necessary to show causal links
- Most outcome measures of this study are self-reported and may be influenced by information or recall bias

## INTRODUCTION

Lean improvements have been initiated in hospitals throughout the world for the benefit of patients, employees and hospital organisations. In the Netherlands, budget constraints and the growing patient population have urged healthcare organisations to improve efficiency and reduce costs while maintaining quality. [1, 2] In addition, the focus on the quality of patient care has been increased by health inspectorate accreditation organisations. As a result of this focus, health care leaders need to focus on efficient, patient-centred operations and continuous quality improvements. [3] One possible way to achieve this is by implementing lean; however, an organisation cannot become lean overnight: lean projects in other industries have shown that the application of lean practices requires perseverance and top-down commitment combined with bottom-up implementation.[4, 5, 6] These requirements imply the crossing of departmental boundaries, collaboration and a high-quality training programme. [7-9]

Little is known about the barriers and facilitators - defined as factors that influence lean implementation - that are encountered during the implementation of lean within hospital settings [10-12]. Various psychology studies and studies of patient safety education have shown that 40 to 50% of the intended actions after training are never executed or are only partially implemented. [13, 14] This finding may also apply to the outcomes of a lean training programme (LTP). However, few studies have discussed the barriers and facilitators that may be encountered in follow-up actions after an LTP in a hospital setting.

The aim of this paper is to provide insight into the barriers and facilitators that are encountered in implementing lean within clinical practices. This paper explores the experiences of team leaders after they attended an LTP to improve their management skills and behaviour to aid in the implementation of lean.

## METHODS

### Setting

The study was conducted at the VU University Medical Center (VUmc), a 733-bed academic hospital located in Amsterdam, the Netherlands. The VUmc employs 5,610 full-time staff operating within a current budget of €301 million. In 2010, the VUmc had 27,096 admissions performed 24,729 outpatient treatments and received 322,696 visits to its outpatient units, of which 122,120 were first contacts. The Dutch Institute for Accreditation in Healthcare (NIAZ) accredited the VUmc by an external audit in the fall of 2010. Subsequently, the VUmc adopted lean as a philosophy for continuous improvement. Roth (2006) describes lean as: “lean is not a program or an outcome, nor does it reside at an executive level or within the workforce. Lean is a way of operating that spans from executive strategy setting for developing people and managing business growth to the commitment of the workforce to continuous improvement”. [15]

During the first wave of lean implementation, after careful debate and commitment from

1  
2  
3 hospital leadership, the selected pilot departments included two surgery wards, the operating theatre of  
4 the VUmc and an affiliated outpatient psychiatry clinic. Subsequently, each of the 35 team leaders of  
5 these departments, who were targeted as key players, participated in a four-day LTP. The total  
6 programme consisted of 16 hours of plenary and group sessions that were led by various lean experts.  
7  
8 The aim of the LTP was to increase the team leaders' knowledge and skills concerning lean  
9 management, with the central goal of transforming these skills and knowledge into leadership  
10 behaviours in day-to-day practice. The key themes included 1] an introduction to lean thinking and  
11 working, 2] management by standards, 3] solving problems and 4] lean leadership. The learning goals  
12 of each theme are displayed in Table 1.  
13  
14  
15  
16  
17  
18  
19  
20  
21  
22  
23  
24  
25  
26  
27  
28  
29  
30  
31  
32  
33  
34  
35  
36  
37  
38  
39  
40  
41  
42  
43  
44  
45  
46  
47  
48  
49  
50  
51  
52  
53  
54  
55  
56  
57  
58  
59  
60

**Table 1. The key themes and the content of the four-day LTP.**

| Key themes                                   | Content of LTP                                                                                                                                                                                                                              |
|----------------------------------------------|---------------------------------------------------------------------------------------------------------------------------------------------------------------------------------------------------------------------------------------------|
| 1. Introduction to lean thinking and working | <ul style="list-style-type: none"> <li>- What is lean? The VUmc definition</li> <li>- The different types of waste</li> <li>- Learning to recognise waste</li> <li>-Operational management as a driver of continuous improvement</li> </ul> |
| 2. Management by standards                   | <ul style="list-style-type: none"> <li>- How to formulate metrics/critical process indicators</li> <li>- The use of visual management</li> <li>- 5S as a lean tool</li> <li>- Stand-ups as a daily routine</li> </ul>                       |
| 3. Solving problems                          | <ul style="list-style-type: none"> <li>- The benefits of standardisation</li> <li>- Asking the appropriate questions for problem solving</li> </ul>                                                                                         |
| 4. Lean leadership                           | <ul style="list-style-type: none"> <li>- What is lean leadership?</li> <li>- A leader's standard work</li> </ul>                                                                                                                            |

At the end of the LTP, all participants were asked to formulate at least one action point for improving their work using lean as an improvement philosophy.

### Qualitative study approach

A qualitative study approach was chosen to elicit in-depth insight into the perspectives of the participants concerning the barriers and facilitators that they encountered after the LTP, as qualitative research methods are helpful in addressing matters that concern organisational behaviour. [16]

Moreover, a study concerning employee perspectives requires a qualitative approach to enhance understanding of the context, personal experiences and interpretations of participants.

### Participants

The participants were selected for an interview if they formulated at least one action point for improvement after completing the LTP. Eventually, 31 healthcare professionals, who were all the head of their team, with an average of 19.2 years of leadership experience, were selected. More than half (18) of the respondents were part of the operating theatre, one-third (9) belonged to the surgery ward and the remainder (4) were part of the mental hospital.

### Data collection

The participants were invited to a semi-structured, in-depth interview three months after the LTP. The semi-structured interviews allowed for new issues to be mentioned during the interview by the respondents. [17] Prior to conducting the interviews, we created an interview guide that contained open questions (Table 2).

**Table 2. Interview guide.**

|                                                                                                                                                                                                |
|------------------------------------------------------------------------------------------------------------------------------------------------------------------------------------------------|
| 1. What is your opinion of the lean training programme in which you have participated in terms of its content and organisation?                                                                |
| 2. What action did you envisage to execute as a result of the lean training?                                                                                                                   |
| 3. Have you succeeded in executing the envisaged action?                                                                                                                                       |
| 4. To what extent has the execution of the action been successful?                                                                                                                             |
| 5. Which factors facilitated the execution of your action?                                                                                                                                     |
| 6. To what extent have these facilitating factors contributed to the execution of your action?                                                                                                 |
| 7. Which factors obstructed the execution of your action?                                                                                                                                      |
| 8. To what extent have these various factors obstructed the execution of your action?                                                                                                          |
| 9. Have you already envisaged new actions that should be addressed by means of lean (whether or not they emerged from previously mentioned actions)? If yes, what actions are you considering? |

This guide provided consistency in the interviews, ensuring that the same general topics were addressed by each of the respondents. The respondents chose a favourable date, place and time for the interviews, which were conducted by the first author. Prior to the interview, the interviewees were informed about the anonymity and confidentiality of the information. The length of the interviews ranged from 23 to 84 minutes, and the interviews were audio recorded with permission from the interviewees. All recordings were transcribed literally (*ad verbatim*) prior to the data analysis.

### Data analysis

First, we investigated the extent to which actions were executed. The following categories were used: 1] fully executed, 2] partially executed and 3] not executed. An action was classified as



1  
2  
3 partially executed if a leader had taken action but had not yet reached the goal or if some of the  
4 required actions had not yet been taken thus far. Second, we investigated how the team leaders had  
5 experienced the lean programme. Experiences, barriers and facilitators were analysed with an  
6 inductive content analysis approach [18]. The first four interviews were used to capture key patterns,  
7 which were used to assign labels to text fragments (open coding). The data that were extracted from  
8 the text fragments were subsequently analysed using a constant comparison method.[19, 20] To ensure  
9 the reliability and accuracy of the data analysis, consistency checks were performed by two different  
10 researchers (the first and the second author). In addition, member checks of the results of the analysis  
11 with the respondents were performed to enhance the credibility of the findings. Subsequently, axial  
12 coding was used to develop a framework of categories that focused on the barriers and facilitators that  
13 summarised the raw data and conveyed the key themes and processes (Table 3).  
14  
15  
16  
17  
18  
19

## 20 21 **RESULTS**

### 22 **Action points**

23  
24 A total of 31 respondents indicated that they had taken action on 159 formulated action points (mean  
25 per respondent: 5.5), with 117 (74%) action points executed and 65 of those 117 (56% of all executed  
26 action points) fully executed. The executed action points included expanding lean knowledge, using  
27 lean tools (e.g., 5S, stand-ups, value stream mapping (VSM)), measuring key performance indicators,  
28 adjusting one's own work structure, learning to recognise waste, asking 'Why' five times, improving  
29 care processes/eliminating waste, giving co-workers time for improvement, involving senior  
30 management, improving the culture, and educating colleagues about lean. Some respondents (n=6)  
31 reported their future intended action points as a follow-up to the original executed action points that  
32 resulted from the LTP. Figure 1 provides an overview of the envisaged action points and the degree to  
33 which the actions were implemented.  
34  
35  
36  
37  
38

39 [Figure 1 here]  
40  
41

### 42 **Experiences with the lean training programme**

43  
44 In general, the majority of the participants experienced the LTP as helpful; they indicated that  
45 they had acquired new skills that were necessary for lean thinking and working. These skills had been  
46 taught during LTP training exercises, which were rated as valuable by the majority of the respondents.  
47 However, although this 'learning by doing' during the training sessions was beneficial, some  
48 respondents noted that 'training on the job' might result in better outcomes: this could be linked to the  
49 finding that most participants found it difficult to apply the acquired skills and knowledge in their  
50 jobs. Some participants stated that the workplace environment was a significant factor that influenced  
51 the extent of this training transfer to the workplace.  
52  
53  
54  
55

56 The majority of the respondents suggested that lean coach interventions (e.g., consultation,  
57 observation, coaching) between the four half-day training sessions may be helpful to transfer the  
58  
59  
60

1  
2  
3 acquired skills and knowledge to their actual work practices. The respondents also suggested a pre-  
4 course briefing with each participant's manager as a means of initiating a discussion on how to apply  
5 the principles, techniques and skills that were learned after they returned from training. One  
6 participant stated that "a pre-course briefing sends a powerful message that the organization is serious  
7 about seeing the benefits of training." Another suggestion was to introduce the programme or deliver  
8 one or more components of the programme to the participants' supervisors or managers. These  
9 suggestions were motivated by the difficulty of executing the intended actions after the LTP, as  
10 reported by the respondents. One respondent stated that "if the training programme does not ultimately  
11 change workplace behaviour, then the money and time spent on training is simply wasted."

12  
13  
14  
15  
16  
17 Most participants actively engaged in the subject matter because they recognized the purpose of  
18 learning lean. The organisational objectives of the programme were clearly described to the  
19 participants at the beginning of the programme. This information was experienced as helpful in  
20 showing how the programme related directly to the day-to-day work of the participants. Nevertheless,  
21 one participant stated that her new role expectations after the training programme were not clearly  
22 communicated to her: "I was left wondering why my superior nominated me for the programme."

23  
24  
25  
26  
27  
28  
29  
30  
31  
32 The participants also appreciated the interpersonal interaction in the training, in which goals and  
33 aspirations were shared, experiences were discussed and work practices were demonstrated. The  
34 participants explained that these interactions resulted in shared learning between the LTP participants  
35 in their workplace.

36  
37  
38  
39  
40  
41  
42  
43  
44  
45  
46  
47  
48  
49  
50  
51  
52  
53  
54  
55  
56  
57  
58  
59  
60  
61  
62  
63  
64  
65  
66  
67  
68  
69  
70  
71  
72  
73  
74  
75  
76  
77  
78  
79  
80  
81  
82  
83  
84  
85  
86  
87  
88  
89  
90  
91  
92  
93  
94  
95  
96  
97  
98  
99  
100  
101  
102  
103  
104  
105  
106  
107  
108  
109  
110  
111  
112  
113  
114  
115  
116  
117  
118  
119  
120  
121  
122  
123  
124  
125  
126  
127  
128  
129  
130  
131  
132  
133  
134  
135  
136  
137  
138  
139  
140  
141  
142  
143  
144  
145  
146  
147  
148  
149  
150  
151  
152  
153  
154  
155  
156  
157  
158  
159  
160  
161  
162  
163  
164  
165  
166  
167  
168  
169  
170  
171  
172  
173  
174  
175  
176  
177  
178  
179  
180  
181  
182  
183  
184  
185  
186  
187  
188  
189  
190  
191  
192  
193  
194  
195  
196  
197  
198  
199  
200  
201  
202  
203  
204  
205  
206  
207  
208  
209  
210  
211  
212  
213  
214  
215  
216  
217  
218  
219  
220  
221  
222  
223  
224  
225  
226  
227  
228  
229  
230  
231  
232  
233  
234  
235  
236  
237  
238  
239  
240  
241  
242  
243  
244  
245  
246  
247  
248  
249  
250  
251  
252  
253  
254  
255  
256  
257  
258  
259  
260  
261  
262  
263  
264  
265  
266  
267  
268  
269  
270  
271  
272  
273  
274  
275  
276  
277  
278  
279  
280  
281  
282  
283  
284  
285  
286  
287  
288  
289  
290  
291  
292  
293  
294  
295  
296  
297  
298  
299  
300  
301  
302  
303  
304  
305  
306  
307  
308  
309  
310  
311  
312  
313  
314  
315  
316  
317  
318  
319  
320  
321  
322  
323  
324  
325  
326  
327  
328  
329  
330  
331  
332  
333  
334  
335  
336  
337  
338  
339  
340  
341  
342  
343  
344  
345  
346  
347  
348  
349  
350  
351  
352  
353  
354  
355  
356  
357  
358  
359  
360  
361  
362  
363  
364  
365  
366  
367  
368  
369  
370  
371  
372  
373  
374  
375  
376  
377  
378  
379  
380  
381  
382  
383  
384  
385  
386  
387  
388  
389  
390  
391  
392  
393  
394  
395  
396  
397  
398  
399  
400  
401  
402  
403  
404  
405  
406  
407  
408  
409  
410  
411  
412  
413  
414  
415  
416  
417  
418  
419  
420  
421  
422  
423  
424  
425  
426  
427  
428  
429  
430  
431  
432  
433  
434  
435  
436  
437  
438  
439  
440  
441  
442  
443  
444  
445  
446  
447  
448  
449  
450  
451  
452  
453  
454  
455  
456  
457  
458  
459  
460  
461  
462  
463  
464  
465  
466  
467  
468  
469  
470  
471  
472  
473  
474  
475  
476  
477  
478  
479  
480  
481  
482  
483  
484  
485  
486  
487  
488  
489  
490  
491  
492  
493  
494  
495  
496  
497  
498  
499  
500  
501  
502  
503  
504  
505  
506  
507  
508  
509  
510  
511  
512  
513  
514  
515  
516  
517  
518  
519  
520  
521  
522  
523  
524  
525  
526  
527  
528  
529  
530  
531  
532  
533  
534  
535  
536  
537  
538  
539  
540  
541  
542  
543  
544  
545  
546  
547  
548  
549  
550  
551  
552  
553  
554  
555  
556  
557  
558  
559  
560  
561  
562  
563  
564  
565  
566  
567  
568  
569  
570  
571  
572  
573  
574  
575  
576  
577  
578  
579  
580  
581  
582  
583  
584  
585  
586  
587  
588  
589  
590  
591  
592  
593  
594  
595  
596  
597  
598  
599  
600  
601  
602  
603  
604  
605  
606  
607  
608  
609  
610  
611  
612  
613  
614  
615  
616  
617  
618  
619  
620  
621  
622  
623  
624  
625  
626  
627  
628  
629  
630  
631  
632  
633  
634  
635  
636  
637  
638  
639  
640  
641  
642  
643  
644  
645  
646  
647  
648  
649  
650  
651  
652  
653  
654  
655  
656  
657  
658  
659  
660  
661  
662  
663  
664  
665  
666  
667  
668  
669  
670  
671  
672  
673  
674  
675  
676  
677  
678  
679  
680  
681  
682  
683  
684  
685  
686  
687  
688  
689  
690  
691  
692  
693  
694  
695  
696  
697  
698  
699  
700  
701  
702  
703  
704  
705  
706  
707  
708  
709  
710  
711  
712  
713  
714  
715  
716  
717  
718  
719  
720  
721  
722  
723  
724  
725  
726  
727  
728  
729  
730  
731  
732  
733  
734  
735  
736  
737  
738  
739  
740  
741  
742  
743  
744  
745  
746  
747  
748  
749  
750  
751  
752  
753  
754  
755  
756  
757  
758  
759  
760  
761  
762  
763  
764  
765  
766  
767  
768  
769  
770  
771  
772  
773  
774  
775  
776  
777  
778  
779  
780  
781  
782  
783  
784  
785  
786  
787  
788  
789  
790  
791  
792  
793  
794  
795  
796  
797  
798  
799  
800  
801  
802  
803  
804  
805  
806  
807  
808  
809  
810  
811  
812  
813  
814  
815  
816  
817  
818  
819  
820  
821  
822  
823  
824  
825  
826  
827  
828  
829  
830  
831  
832  
833  
834  
835  
836  
837  
838  
839  
840  
841  
842  
843  
844  
845  
846  
847  
848  
849  
850  
851  
852  
853  
854  
855  
856  
857  
858  
859  
860  
861  
862  
863  
864  
865  
866  
867  
868  
869  
870  
871  
872  
873  
874  
875  
876  
877  
878  
879  
880  
881  
882  
883  
884  
885  
886  
887  
888  
889  
890  
891  
892  
893  
894  
895  
896  
897  
898  
899  
900  
901  
902  
903  
904  
905  
906  
907  
908  
909  
910  
911  
912  
913  
914  
915  
916  
917  
918  
919  
920  
921  
922  
923  
924  
925  
926  
927  
928  
929  
930  
931  
932  
933  
934  
935  
936  
937  
938  
939  
940  
941  
942  
943  
944  
945  
946  
947  
948  
949  
950  
951  
952  
953  
954  
955  
956  
957  
958  
959  
960  
961  
962  
963  
964  
965  
966  
967  
968  
969  
970  
971  
972  
973  
974  
975  
976  
977  
978  
979  
980  
981  
982  
983  
984  
985  
986  
987  
988  
989  
990  
991  
992  
993  
994  
995  
996  
997  
998  
999  
1000

Despite the positive evaluation, some respondents experienced challenges concerning the timing  
of the LTP. These respondents would have preferred to attend the LTP in the morning or afternoon  
rather than in the early evening, given the low level of alertness after a day of work. Furthermore,  
some respondents proposed reading and exercises between meetings to prepare for the training  
programme.

### Perceived barriers and facilitators

Barriers and facilitators were defined as factors that influence the implementation of lean from the  
perspectives of participants. The participants addressed issues that were primarily related to internal  
organisation and leadership. Occasionally, the participants cited environmental factors; however, these  
factors were not considered in the analysis because organisations and leaders have little control over  
them when implementing lean.

#### *Senior management support and commitment*

The participants noted that it is important for lean implementation that team leaders, supervisors and  
management exemplify the desired behaviour. Participants characterised this behaviour as 'the support  
and commitment of senior management'. The *barrier* 'lack of management commitment' refers to  
whether top management was involved in lean implementation, spent time in the workplace to

1  
2  
3 supervise the process as part of their support, and provided the necessary resources to implement lean  
4 in the workplace. One participant offered the following explanation: “The problem is that top  
5 management sits in their ivory towers. They trust that everything will work out fine on the work floor.  
6 I think there is too much distance between management and their teams because they are always busy,  
7 busy, busy.” Another respondent stated the following: “I think that motivation is very important  
8 because if management stops giving support, lean will fall apart.” In contrast, the respondents who  
9 noted that leaders served as role models for the desired behaviour considered management support to  
10 be a *facilitator* of lean implementation.  
11  
12  
13  
14  
15

### 16 17 *Resources*

18 The respondents considered sufficient resources, such as time to make improvements, sufficient staff  
19 resources, and financial support for employee training, to be critical to a successful lean  
20 implementation. The majority of the respondents noted that the implementation was hindered by  
21 insufficient available time. One respondent stated that “one of the main barriers is time. That is the  
22 main hindrance. I find it very disappointing that after the training, you have a positive attitude towards  
23 change, but in your daily routine, you become rapidly consumed by day-to-day things, and then the  
24 intentions and training will fade away very easily.”  
25  
26  
27  
28  
29

### 30 31 *Strategy and purpose*

32 Important facilitators of lean implementation include a compelling vision and a clear and well-planned  
33 strategy. According to the participants of our study, objectives, purposes and goals must be evident for  
34 everyone involved. One participant stated that “senior management must know for sure what they  
35 want to achieve [with lean], how to achieve it, and know which aspects [for implementing change]  
36 must be taken into account.” The participants also agreed that a lack of integration of a lean strategy  
37 with the overall hospital strategy and other organisation-wide programmes is a major barrier.  
38  
39  
40  
41  
42

### 43 44 *Resistance to change*

45 Several participants perceived their own staff’s lack of motivation to change as a barrier to lean  
46 implementation. Resistance to change is a significant problem in any improvement programme in any  
47 organisation; however, the participants of this study stated that resistance deserves special attention in  
48 lean implementation because staff empowerment is perceived as essential for engaging health care  
49 professionals. One respondent explained that “by empowering employees, team leaders can build on a  
50 nurturing environment in which employees can learn, improve and effectively implement goals.”  
51  
52  
53  
54

### 55 56 *Multidisciplinary collaboration*

57 A lack of multidisciplinary collaboration within a team was experienced as a barrier. Multidisciplinary  
58 collaboration requires teamwork. To function well, team members must work towards a common goal,  
59  
60

1  
2  
3 communicate clearly with other team members, and understand one another's roles. Communication  
4 breakdowns appeared to increase because of cultural and organisational differences between  
5 professionals. Several participants noted that not all team members shared a common language for  
6 making sense of each other's actions. One participant stated the following: "The problems that  
7 demand a multidisciplinary approach are very frustrating problems. You are confronted with difficult  
8 collaboration [not the same understanding of each other's roles and communication problems]  
9 between physicians and operating staff."  
10  
11  
12

### 13 14 15 *Functional and professional silos*

16 Some participants indicated that the fragmentation of the care process into different professional and  
17 functional departments – silos – imposes a major barrier to the flow of patients, goods and  
18 information, and consequently to the implementation of lean techniques in the organisation. Silos can  
19 be important for accomplishing specific, focused tasks; however, although fragmentation in silos  
20 undoubtedly improves specific skills, some participants argued that this fragmentation presents a  
21 challenge in determining how to be effective while still maintaining professional competencies. One  
22 leader stated that "sometimes you experience problems outside your circle of influence, and then you  
23 are stuck with a problem because you have not established an infrastructure that reflects collaborative  
24 work with other departments." According to our respondents, the optimal means of interacting  
25 effectively across silos is to build personal connections and establish common goals as well as to  
26 support those people who are willing to reach across boundaries and celebrate successes.  
27  
28  
29  
30  
31  
32  
33

### 34 35 *Training and education*

36 The transfer of knowledge acquired from the LTP into practice was also perceived as a barrier. The  
37 participants cited the lack of knowing how to use lean tools in daily practices as a barrier. One  
38 participant said that "not knowing how to use lean tools, such as "5 Whys", is a barrier. You may try  
39 using the "5 Whys" tool to determine which area you can improve." Furthermore, the respondents  
40 pointed to their lack of experience in the principles, methods and tools of lean thinking. Many  
41 respondents suggested that coaching during implementation and site visits to other lean organisations  
42 (e.g. Scania, Toyota) would be helpful.  
43  
44  
45  
46  
47  
48  
49  
50  
51  
52  
53  
54  
55  
56  
57  
58  
59  
60

Table 3. Barriers to and facilitators of lean implementation.

| <b>Barrier/Facilitator</b>                             | <b>Meaning</b>                                                                                                                                                                                                                                                                                                                                                                                                                                                                                                |
|--------------------------------------------------------|---------------------------------------------------------------------------------------------------------------------------------------------------------------------------------------------------------------------------------------------------------------------------------------------------------------------------------------------------------------------------------------------------------------------------------------------------------------------------------------------------------------|
| <b><i>Senior management support and commitment</i></b> | Leaders are important in acting as role models to exemplify the desired behaviours for lean implementation. As with all change and improvement programmes, support and commitment from senior management is critical to a lean initiative. The ‘management commitment’ barrier referred to whether top management was involved in lean implementation, spent time in the workplace to supervise the process as part of their support and provided the necessary resources to implement lean in the workplace. |
| <b><i>Resources</i></b>                                | Because the availability of resources is a primary concern in health care organisations, it must be properly considered when implementing lean. The ‘resources’ barrier has two meanings. The majority of the respondents mentioned that implementation was hindered because of insufficient available time. Others mentioned that a lack of personnel resources hindered the implementation.                                                                                                                 |
| <b><i>Strategy and purpose</i></b>                     | One of the drivers for the success of lean is to have a clear, well-communicated strategy. Constant changes in an improvement strategy inhibit the continuity of potentially successful programmes.                                                                                                                                                                                                                                                                                                           |
| <b><i>Resistance to change</i></b>                     | Resistance to change is a significant problem in any improvement programme in any organisation. Resistance deserves special attention from those attempting to implement lean because staff empowerment, which is a key issue in lean theory, is needed for engaging health care professionals.                                                                                                                                                                                                               |
| <b><i>Multidisciplinary collaboration</i></b>          | Collaboration (or the lack thereof) within a multi-disciplinary team was experienced as a barrier in most cases.                                                                                                                                                                                                                                                                                                                                                                                              |
| <b><i>Functional and professional silos</i></b>        | The fragmentation of health care organisations into silos (professional or functional) imposes a major barrier to the flow of patients, goods and information and consequently to the implementation of lean techniques in an organisation.                                                                                                                                                                                                                                                                   |
| <b><i>Training and education</i></b>                   | The successful implementation of lean requires employees to be effective problem solvers and learners, thereby eliminating errors and making operating improvements. The knowledge that is acquired in the LTP and the transfer of this knowledge into practice were perceived as constituting a barrier. Moreover, this barrier referred to the lack of experience in the principles, methods and tools of lean thinking and working.                                                                        |

## DISCUSSION

The purpose of this study was to investigate the experiences of hospital leaders (middle management) in implementing lean after attending an LTP. This study also aimed to provide further insight into the barriers and facilitators that may be encountered when implementing lean within a clinical practice. The results indicate that the involvement of top management and the creation of a shared learning environment are important factors in the successful implementation of lean; in addition, we observed a need for a holistic lean philosophy.

In general, the findings suggest that the daily presence of top management on the work floor is a key factor in the success of lean implementation. Most participants of our study experienced a lack of involvement of top management, and many wanted leaders to be present in daily settings more frequently and to function as role models. We feel that by doing so, leaders could increase ownership of the processes and encourage and empower employees to participate in lean. Previous studies of lean implementation have also reported a relationship between the success of lean implementation and management leadership behaviour. [20-25] Top management should be more involved and must take ownership of lean programmes.[26]

According to our study, a lack of vision and strategy regarding how to integrate lean with the overall hospital strategy is a major barrier to lean implementation. Lean implementation in the Dutch context began with techniques: leaders attempted to implement isolated parts of the lean system without understanding the entire philosophy. However, the literature has shown that lean philosophy and techniques require the adoption of the entire system in a holistic manner, rather than applying techniques in a piecemeal fashion. [27] The comments of our participants also indicate that LTPs might be more effective if they are established as a multi-dimensional activity: not merely creating a list of lean tools and methodologies and learning how to use them, but also applying a certain hierarchy. This means that to learn advanced tools or methodologies, people must first learn the basics and then build from there. We believe that achieving this hierarchical approach requires an understanding of all aspects of implementing lean. While some tools and methodologies can be presented in a classroom, others must include exercises or a practical portion of training to show the relation with other aspects of lean.

Some lean tools can, arguably, only be learned by applying them in real work situations, so-called 'learning by doing'. [22, 28-36] The findings of this study demonstrate that the participants experience challenges in applying the acquired knowledge in practice, and they articulated a need for training on the job. However, lean gains meaning for specific contexts through the sharing of insights, knowledge and challenges, and the findings also support the need for a continuous learning environment in which insights and knowledge are shared. This dialogical process may encourage collaboration between colleagues and facilitate the transfer of learning goals to daily practices. Other studies have also addressed this importance of dialogical learning in lean.[37] We suggest that mixing training on the job and continuous learning environment may facilitate dialogical learning.

1  
2  
3  
4  
5  
6  
7  
8  
9  
10  
11  
12  
13  
14  
15  
16  
17  
18  
19  
20  
21  
22  
23  
24  
25  
26  
27  
28  
29  
30  
31  
32  
33  
34  
35  
36  
37  
38  
39  
40  
41  
42  
43  
44  
45  
46  
47  
48  
49  
50  
51  
52  
53  
54  
55  
56  
57  
58  
59  
60

Studies have addressed the importance of leadership skills for creating cultures that promote sharing and creating knowledge. [38] These studies suggest that the foundation of such cultures entails empowerment, dialogue, collaboration and the establishment of a set of roles to perform knowledge-related tasks. By providing the 'appropriate' roles and rules, strategies and training programme, one expects improvement in the implementation of lean; however, the findings of our study contradict this approach. According to the study participants, physicians and operating staff are highly trained individuals who act with autonomy, whereas lean culture requires teamwork and collaboration.[39, 40] Therefore, establishing an 'appropriate' hierarchy and a set of roles does not appear to be sufficient. In a hospital setting, multidisciplinary collaboration may lead to instrumental approaches to creating a learning environment, and such approaches may hinder lean implementation. An alternative approach could involve working from interpretative traditions in organisational studies. [41, 42] These traditions acknowledge the complexity and ambiguities of daily practices in organisations and consider organisations to be relational and socially constructed environments. Within the dynamic hospital environment, lean can gain meaning gradually. Rather than something to be implemented, the meaning of lean can emerge slowly. Leaders could focus more on the lean meaning-making process through several participants involved rather than on implementing lean as a fact.

## CONCLUSION

Implementing lean in a hospital setting is a challenge because of the ambiguous and complex environment of a highly professionalised organisation. This study investigated a wide range of barriers to and facilitators of lean implementation in a clinical setting. The study found that leadership management support and a continuous learning environment are important facilitators of lean implementation. To increase the successful outcomes of leadership intentions and actions, training should be supplemented with actions to remove perceived barriers, most of which are related to the organisational and social context of leaders. The successful implementation of lean actions by leaders requires the involvement of all professionals, the crossing of departmental boundaries and a focus on meaning-making processes rather than simply 'implementing' facts. Therefore, this research suggests that programme participants, such as staff members and leaders, can mutually explore the meanings of lean thinking and working for their own contexts. By entering this shared learning process (e.g., learning on the job) the ownership of lean implementation could also increase.

### Acknowledgements

KA is the principle researcher and was responsible for the design of the study. KA and FS conducted the data collection and were responsible for the data analysis. MV and GW supervised the study. All authors contributed to the writing of this paper and approved the final manuscript.

### Competing interests and funding

All authors have completed the ICMJE uniform disclosure form at [www.icmje.org/coi\\_disclosure.pdf](http://www.icmje.org/coi_disclosure.pdf) and declare: KA has received a research grant from LIDZ: a Dutch network for lean healthcare for the submitted work; non-financial relationships with any organizations that might have an interest in the submitted work in the previous three years; no other relationships or activities that could appear to have influenced the submitted work.

### Contributorship

KA is the principle researcher and was responsible for the design of the study. KA and FS conducted the data collection and were responsible for the data analysis. MV and GW supervised the study. All authors contributed to the writing of this paper and approved the final manuscript.

### Data sharing

All data from the study is available, only on request at the author.

### References

- 1 Slobbe LCJ, Smit JM, Groen J, Poos MJJC, Kommer GJ .Cost of Illness in the Netherlands 2007 : Trends in healthcare expenditure 1999-2010. Retrieved from The National Institute for Public Health and the Environment website:  
[http://www.rivm.nl/dsresource?objectid=rivmp:61294&type=org&disposition=inline&ns\\_nc=1](http://www.rivm.nl/dsresource?objectid=rivmp:61294&type=org&disposition=inline&ns_nc=1). Last accessed date: November 28<sup>th</sup> 2011
- 2 Al, MJ, Feenstra T, Brouwer WBF. Corrigendum to “Decision makers’ views on health care objectives and budget constraints: results from a pilot study”. *Health Policy* 2005;**74**:109–11.
3. Øvretveit, J. (2005). Leading improvement. *Journal of health organization and management*, 19(6), 413-430.
4. Womack, J. P., & Jones, D. T. (2003). *Lean thinking: Banish waste and create wealth in your corporation* (First Free Press 2003 ed.). New York: Free Press.
- 5 Ben-Tovim DI. Seeing the picture through ‘lean thinking’. *BMJ*2007;**334**:169.
- 6 Radnor Z, Walley P, Stephens A, et al. Evaluation of the Lean Approach to BusinessManagement



- 1  
2  
3 and its Use in the Public Sector. Edinburgh: The Scottish Government 2006.
- 4 7 Ballé M Régnier A. Lean as a learning system in a hospital ward. *Leadersh Health Serv* 2007;**20**:33–  
5 41.
- 6  
7 8 de Souza LB, Pidd M. Exploring the barriers to lean health care implementation. *Public Money &*  
8 *Management* 2011;**31**:59–66.
- 9  
10 9 Mazur L, McCreery J, Rothenberg L. Facilitating lean learning and behaviors in hospitals during the  
11 early stages of lean implementation. *Engineering Management Journal* 2010;**24**:11–22.
- 12  
13 10 De Souza, L. B. (2009). Trends and approaches in lean healthcare. *Leadership in Health Services*,  
14 22(2), 121-139.
- 15 11 Robinson, S., Radnor, Z. J., Burgess, N., & Worthington, C. (2012). SimLean:  
16 Utilising simulation in the implementation of lean in healthcare. *European Journal of Operational*  
17 *Research*, 219(1), 188-197.
- 18  
19 12 Burgess, N., & Radnor, Z. (2013). Evaluating Lean in healthcare. *International journal of health*  
20 *care quality assurance*, 26(3), 220-235.
- 21  
22 13 Holland R, Meyers D. Creating champions for health care quality and safety. *Am J Med Qual*  
23 2010;**25**:102–8.
- 24  
25 14 Salanova M, Schaufeli W, Martinez I, Breso E. How obstacles and facilitators predict academic  
26 performance: the mediating role of study burnout and engagement. *Anxiety Stress Coping* 2010; **23**:53–  
27 70.
- 28  
29 15 Roth, G. (2006, May). Distributing leadership practices for lean transformation. *Reflections: The*  
30 *SoL Journal*, 7 (2), pp. 15-29.
- 31  
32 16 Ehigie BO, Ehigie RI. Applying qualitative methods in organizations: A note for  
33 industrial/organizational psychologists. *Qual Rep* 2005;**10**:621–38.
- 34  
35 17 Lindlof TR, Taylor BC. Qualitative communication research methods, third edition. Thousand  
36 Oaks, CA: Sage 2011.
- 37  
38 18 Krippendorff, K. (1980). Clustering. In P. R. Monge & J. N. Cappella (Eds.), *Multivariate*  
39 *Techniques in Human Communication Research* (pp. 259-308). New York, NY:
- 40  
41 19 Pope C, Ziebland S, Mays N. Qualitative research in health care. Analysing qualitative data. *BMJ*  
42 2000;**320**:114–6.
- 43  
44 20 Boeije, HR. Analysis in Qualitative Research. London: SAGE Publications Ltd 2010
- 45  
46 21 Bahensky JA, Roe J, Bolton R. Lean sigma—will it work for healthcare? *J Healthc Inf Manag*  
47 2005;**19**:39–44.
- 48  
49 22 Fillingham D. Can lean save lives? *Leadersh Health Serv* 2007;**20**:231–41.
- 50  
51 23 Aherne J. Think lean. *J Nurs Manag* 2007;**13**:13–5.
- 52  
53 24 Massey L, Williams S. CANDO: implementing change in an NHS Trust. *Int J Public Sect*  
54 *Manag* 2005;**18**:330–49.
- 55  
56 25 Nelson-Peterson D, Leppa C. Creating an environment for caring using lean principles of the  
57 Virginia Mason Production System. *J Nurs Adm* 2007;**37**:287–93.
- 58  
59  
60

- 1  
2  
3 26 Kotter JR. Leading change: Why transformation efforts fail. *Harv Bus Rev* 2007;**85**: 96–103.
- 4 27 Womack JP, Jones DT. Beyond Toyota: How to root out waste and pursue  
5 perfection. *Harv Bus Rev* 1996;**74**:140–58.
- 6  
7 28 Dickson EW, Singh S, Cheung DS, et al. Application of lean manufacturing techniques in the  
8 emergency department. *J Emerg Med* 2008;**37**:177–182.
- 9  
10 29 Kaplan G, Patterson S. Seeking perfection in healthcare. A case study in adopting Toyota  
11 Production System methods. *Healthc Exec* 2008;**23**:16–21.
- 12  
13 30 Jimmerson C, Weber D, Sobek D. Reducing waste and errors: piloting lean principles at IHC. *J*  
14 *QualSaf* 2005;**31**:249–57.
- 15  
16 31 Manos A, Sattler M, Alukal G. Make healthcare lean. *QualProg* 2006;**39**:24.
- 17  
18 32 Aherne J. Think lean. *J NursManag* 2007;**13**:13–5.
- 19  
20 33 Esain A, Williams S, Massey L. Combining planned and emergent change in a healthcare lean  
21 transformation. *Public Money Manage* 2008;**28**:21–6.
- 22  
23 34 Panchak P. Lean health care? It works! *Ind Week* 2003;**252**:34–40.
- 24  
25 35 Persoon T, Zaleski S, Frerichs J. Improving preanalytic processes using the principles of lean  
26 production (Toyota Production System). *Am J ClinPathol* 2006;**125**:16–25.
- 27  
28 36 Achanga P, Shehab E, Roy R, et al. Critical success factors for lean implementation within  
29 SMEs. *Journal of Manufacturing Technology Management* 2006;**17**:460–71.
- 30  
31 37 Martinez Leon HC, Temblador Perez MDC, Farris JA, et al. Integrating Six Sigma tools using  
32 team-learning processes. *International Journal of Lean Six Sigma* 2010;**3**:133–156.
- 33  
34 38 Czabke J, Hansen EN, Doolen TL. A multisite field study of lean thinking in US and German  
35 secondary wood products manufacturers. *Forest Prod J* 2008;**58**:77–85.
- 36  
37 39 Endsley S, Magill MK, Godfrey MM. Creating a lean practice. *FamPractManag* 2006;**13**:34–8.
- 38  
39 40 Spear SJ. Fixing health care from the inside: teaching residents to heal broken delivery processes as  
40 they heal sick patients. *Acad Med* 2006;**81**:144–9.
- 41  
42 41 Weick, KE. Sensemaking in Organizations, Thousand Oaks, California: SAGE Publications  
43 Inc 1995
- 44  
45 42 Czarniawska B. Emerging Institutions: Pyramids or Anthills? *Organization Studies* 2009;**30**:423-  
46 441.
- 47  
48  
49  
50  
51  
52  
53  
54  
55  
56  
57  
58  
59  
60

1  
2  
3 Figure 1. Overview of the envisaged and executed action points.  
4  
5  
6  
7  
8  
9  
10  
11  
12  
13  
14  
15  
16  
17  
18  
19  
20  
21  
22  
23  
24  
25  
26  
27  
28  
29  
30  
31  
32  
33  
34  
35  
36  
37  
38  
39  
40  
41  
42  
43  
44  
45  
46  
47  
48  
49  
50  
51  
52  
53  
54  
55  
56  
57  
58  
59  
60

For peer review only

Overview envisaged and executed action points

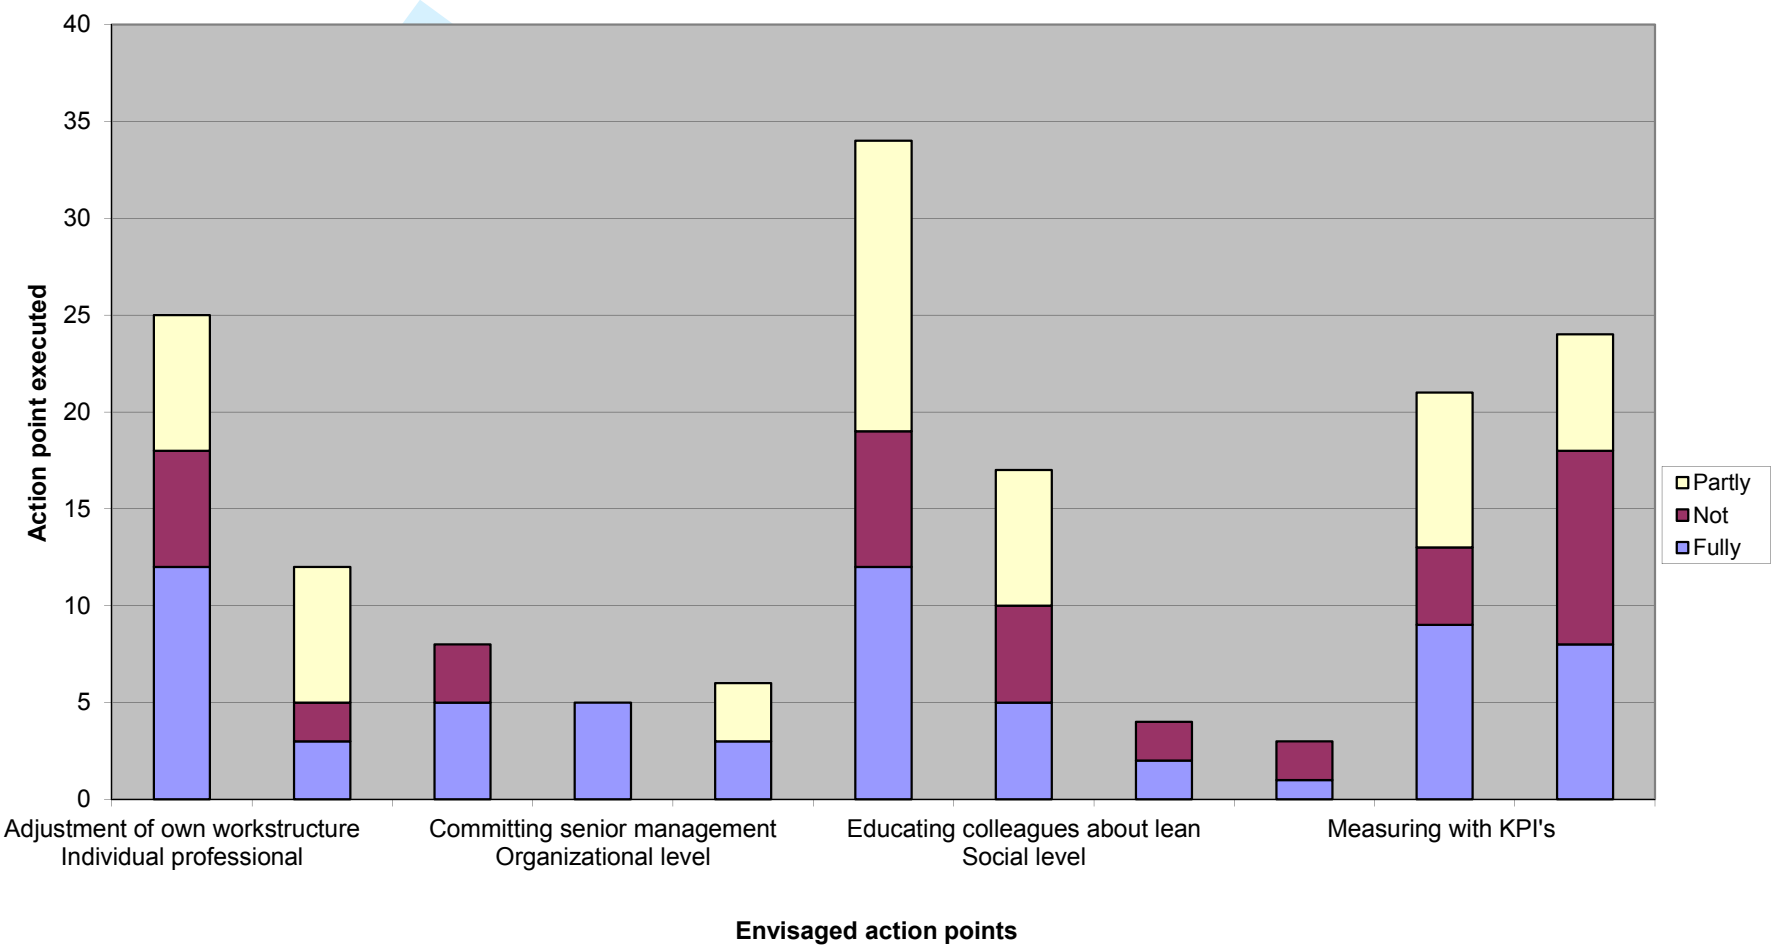

| Som van N                      |                                                       | AP executed |
|--------------------------------|-------------------------------------------------------|-------------|
| Level of implementation        | Action point (AP)                                     | Fully       |
| Individual professional        | Adjustment of own workstructure                       | 12          |
|                                | Asking 'Why' to improve understanding of care process | 3           |
|                                | Learning to see waste                                 | 5           |
| Totaal Individual professional |                                                       | 20          |
| Organizational level           | Committing senior management                          | 5           |
|                                | Giving co-workers time for making improvements        | 3           |
|                                | Improving care processes/eliminating waste            | 12          |
| Totaal Organizational level    |                                                       | 20          |
| Social level                   | Educating colleagues about lean                       | 5           |
|                                | Improving culture                                     | 2           |
| Totaal Social level            |                                                       | 7           |
| The innovation itself          | Improving knowledge about lean                        | 1           |
|                                | Measuring with KPI's                                  | 9           |
|                                | Using lean tools (e.g. 5S, stand-up, VSM)             | 8           |
| Totaal The innovation itself   |                                                       | 18          |
| Eindtotaal                     |                                                       | 65          |

| Not | Partly | Eindtotaal |
|-----|--------|------------|
| 6   | 7      | 25         |
| 2   | 7      | 12         |
| 3   | 0      | 8          |
| 11  | 14     | 45         |
| 0   | 0      | 5          |
| 0   | 3      | 6          |
| 7   | 15     | 34         |
| 7   | 18     | 45         |
| 5   | 7      | 17         |
| 2   | 0      | 4          |
| 7   | 7      | 21         |
| 2   | 0      | 3          |
| 4   | 8      | 21         |
| 10  | 6      | 24         |
| 16  | 14     | 48         |
| 41  | 53     | 159        |

|    | <b>Level of implementation</b> | <b>Action point (AP)</b>                              | <b>AP executed</b> | <b>N</b> |
|----|--------------------------------|-------------------------------------------------------|--------------------|----------|
| 1  |                                |                                                       |                    |          |
| 2  |                                |                                                       |                    |          |
| 3  |                                |                                                       |                    |          |
| 4  | The innovation itself          | Improving knowledge of lean                           | Fully              | 1        |
| 5  | The innovation itself          | Improving knowledge of lean                           | Partly             | 0        |
| 6  | The innovation itself          | Improving knowledge of lean                           | Not                | 2        |
| 7  | The innovation itself          | Using lean tools (e.g., 5S, stand-ups, VSM)           | Fully              | 8        |
| 8  | The innovation itself          | Using lean tools (e.g., 5S, stand-ups, VSM)           | Partly             | 6        |
| 9  | The innovation itself          | Using lean tools (e.g., 5S, stand-ups, VSM)           | Not                | 10       |
| 10 | The innovation itself          | Measuring with KPIs                                   | Fully              | 9        |
| 11 | The innovation itself          | Measuring with KPIs                                   | Partly             | 8        |
| 12 | The innovation itself          | Measuring with KPIs                                   | Not                | 4        |
| 13 | Individual professional        | Adjustment of own work structure                      | Fully              | 12       |
| 14 | Individual professional        | Adjustment of own work structure                      | Partly             | 7        |
| 15 | Individual professional        | Adjustment of own work structure                      | Not                | 6        |
| 16 | Individual professional        | Learning to recognise waste                           | Fully              | 5        |
| 17 | Individual professional        | Learning to recognise waste                           | Partly             | 0        |
| 18 | Individual professional        | Learning to recognise waste                           | Not                | 3        |
| 19 | Individual professional        | Asking 'Why' to improve understanding of care process | Fully              | 3        |
| 20 | Individual professional        | Asking 'Why' to improve understanding of care process | Partly             | 7        |
| 21 | Individual professional        | Asking 'Why' to improve understanding of care process | Not                | 2        |
| 22 | Organisational level           | Improving care processes/eliminating waste            | Fully              | 12       |
| 23 | Organisational level           | Improving care processes/eliminating waste            | Partly             | 15       |
| 24 | Organisational level           | Improving care processes/eliminating waste            | Not                | 7        |
| 25 | Organisational level           | Giving co-workers time to make improvements           | Fully              | 3        |
| 26 | Organisational level           | Giving co-workers time to make improvements           | Partly             | 3        |
| 27 | Organisational level           | Giving co-workers time to make improvements           | Not                | 0        |
| 28 | Organisational level           | Committing senior management                          | Fully              | 5        |
| 29 | Organisational level           | Committing senior management                          | Partly             | 0        |
| 30 | Organisational level           | Committing senior management                          | Not                | 0        |
| 31 | Social level                   | Improving culture                                     | Fully              | 2        |
| 32 | Social level                   | Improving culture                                     | Partly             | 0        |
| 33 | Social level                   | Improving culture                                     | Not                | 2        |
| 34 | Social level                   | Educating colleagues about lean                       | Fully              | 5        |
| 35 | Social level                   | Educating colleagues about lean                       | Partly             | 7        |
| 36 | Social level                   | Educating colleagues about lean                       | Not                | 5        |
| 37 |                                |                                                       |                    |          |
| 38 |                                |                                                       |                    |          |
| 39 |                                |                                                       |                    |          |
| 40 |                                |                                                       |                    |          |
| 41 |                                |                                                       |                    |          |
| 42 |                                |                                                       |                    |          |
| 43 |                                |                                                       |                    |          |
| 44 |                                |                                                       |                    |          |
| 45 |                                |                                                       |                    |          |
| 46 |                                |                                                       |                    |          |
| 47 |                                |                                                       |                    |          |
| 48 |                                |                                                       |                    |          |
| 49 |                                |                                                       |                    |          |
| 50 |                                |                                                       |                    |          |
| 51 |                                |                                                       |                    |          |
| 52 |                                |                                                       |                    |          |
| 53 |                                |                                                       |                    |          |
| 54 |                                |                                                       |                    |          |
| 55 |                                |                                                       |                    |          |
| 56 |                                |                                                       |                    |          |
| 57 |                                |                                                       |                    |          |
| 58 |                                |                                                       |                    |          |
| 59 |                                |                                                       |                    |          |
| 60 |                                |                                                       |                    |          |



**Experiences of Leaders in the Implementation of Lean in a Teaching Hospital: Barriers and Facilitators in Clinical Practices**

|                                 |                                                                                                                                                                                                                                                                                                                                                                   |
|---------------------------------|-------------------------------------------------------------------------------------------------------------------------------------------------------------------------------------------------------------------------------------------------------------------------------------------------------------------------------------------------------------------|
| Journal:                        | <i>BMJ Open</i>                                                                                                                                                                                                                                                                                                                                                   |
| Manuscript ID:                  | bmjopen-2013-003605.R1                                                                                                                                                                                                                                                                                                                                            |
| Article Type:                   | Research                                                                                                                                                                                                                                                                                                                                                          |
| Date Submitted by the Author:   | 05-Sep-2013                                                                                                                                                                                                                                                                                                                                                       |
| Complete List of Authors:       | Aij, Kjeld; VU University Medical Center, Anesthesiology and Operative Care<br>Simons, Frederique; VU University Medical Center, Quality Improvement in Patient Care<br>Widdershoven, Guy; VU University Medical Center, EMGO+ Institute for health and Care Research<br>Visse, Merel; VU University Medical Center, EMGO+ Institute for health and Care Research |
| <b>Primary Subject Heading</b>: | Medical management                                                                                                                                                                                                                                                                                                                                                |
| Secondary Subject Heading:      | Medical education and training                                                                                                                                                                                                                                                                                                                                    |
| Keywords:                       | Change management < HEALTH SERVICES ADMINISTRATION & MANAGEMENT, Quality in health care < HEALTH SERVICES ADMINISTRATION & MANAGEMENT, MEDICAL EDUCATION & TRAINING                                                                                                                                                                                               |
|                                 |                                                                                                                                                                                                                                                                                                                                                                   |

SCHOLARONE™  
Manuscripts

only



1  
2  
3 **Title: Experiences of Leaders in the Implementation of Lean in a Teaching Hospital: Barriers**  
4 **and Facilitators in Clinical Practices**  
5

6  
7 **KH Aij, MBA, FE Simons, MSc, GAM Widdershoven, M Visse**  
8

9  
10 Kjeld Harald Aij MBA  
11 VU University Medical Center  
12 Department of Anaesthesiology & Operative Care  
13 De Boelelaan 1117 (6A12)  
14 1081 HV AMSTERDAM  
15 The Netherlands  
16 e-mail: [k.ajj@vumc.nl](mailto:k.ajj@vumc.nl)  
17 tel: +31204442156  
18

19  
20 Frederique Elisabeth Simons MSc  
21 VU University Medical Center  
22 Department for Quality Improvement in Patient Care  
23 De Boelelaan 1117 (6A12)  
24 1081 HV AMSTERDAM  
25 The Netherlands  
26 [f.simons@vumc.nl](mailto:f.simons@vumc.nl)  
27

28  
29 Prof. dr. Guy A.M. Widdershoven  
30 VU University Medical Center, EMGO+ Institute for Health and Care Research, Department of  
31 Medical Humanities  
32 Van der Boechorstraat 7  
33 1081 BT Amsterdam  
34 The Netherlands  
35 [g.widdershoven@vumc.nl](mailto:g.widdershoven@vumc.nl)  
36

37  
38 Dr. Merel Visse  
39 VU University Medical Center, EMGO+ Institute for Health and Care Research, Department of  
40 Medical Humanities  
41 Van der Boechorstraat 7  
42 1081 BT Amsterdam  
43 The Netherlands  
44 [m.visse@vumc.nl](mailto:m.visse@vumc.nl)  
45

46  
47 Keywords: lean, barriers, facilitators, training, implementation  
48

49  
50 Word count: 3.472 (excluding title page, abstract, article summary, references, figures and tables)  
51  
52  
53  
54  
55  
56  
57  
58  
59  
60

## Abstract

### Objectives

To date, experiences of leaders in the implementation of lean after a lean training programme have not been systematically investigated within teaching hospitals. Existing studies have identified barriers and facilitators only from an improvement programme perspective and have not considered the experiences of leaders themselves. This study aims to bridge this gap.

### Design

Semi-structured, in-depth interviews.

### Setting

One of largest teaching hospitals in the Netherlands.

### Participants

31 medical, surgical, and nursing professionals with an average of 19.2 years of supervisory experience. All professionals were appointed to a Lean Training Programme and were directly involved in the implementation of lean.

### Results

The evidence obtained in this study shows that, from the perspectives of participants, leadership management support, a continuous learning environment, and cross-departmental cooperation play a significant role in successful lean implementation. The results suggest that a lean training programme contributed to positive outcomes in personal and professional skills that were evident during the first four months after programme completion.

### Conclusion

Implementing lean in a teaching hospital setting is a challenge because of the ambiguous and complex environment of a highly professionalised organisation. The study found that leadership management support and a continuous learning environment are important facilitators of lean implementation. To increase the successful outcomes of leadership actions, training should be supplemented with actions to remove perceived barriers. This requires the involvement of all professionals, the crossing of departmental boundaries and a focus on meaning-making processes rather than simply 'implementing' facts. Therefore, this research suggests that programme participants, such as staff members and leaders, can mutually explore the meanings of lean thinking and working for their own contexts. By entering this shared learning process (e.g., learning on the job) the ownership of lean implementation could also increase.

## Article Summary

### Article focus

- To investigate experiences of leaders in the implementation of lean after a lean training programme within teaching hospitals
- To provide further insight into the barriers and facilitators that may be encountered when implementing lean within a clinical practice.

### Key messages

- The study found that leadership management support and a continuous learning environment are important facilitators of lean implementation.
- The successful implementation of lean actions by leaders requires the involvement of all professionals, the crossing of departmental boundaries and a focus on meaning-making processes rather than simply 'implementing' facts.
- To increase the successful outcomes of leadership actions, training should be supplemented with actions to remove perceived barriers, most of which are related to the organisational and social context of leaders.

### Strengths and limitations of this study

- We acquired detailed records of leader experiences in clinical practices
- This was a qualitative study whose purpose was to explore experiences of leaders in the implementation of lean in a teaching hospital; further multiple-centre studies are necessary to show causal links
- Most outcome measures of this study are self-reported and may be influenced by information or recall bias

## INTRODUCTION

Lean improvements have been initiated in hospitals throughout the world for the benefit of patients, employees and hospital organisations. In the Netherlands, budget constraints and the growing patient population have urged healthcare organisations to improve efficiency and reduce costs while maintaining quality. [1, 2] In addition, the focus on the quality of patient care has been increased by health inspectorate accreditation organisations. As a result of this focus, health care leaders need to focus on efficient, patient-centred operations and continuous quality improvements. [3] One possible way to achieve this is by implementing lean; however, an organisation cannot become lean overnight: lean projects in other industries have shown that the application of lean practices requires perseverance and top-down commitment combined with bottom-up implementation. [4-6] These requirements imply the crossing of departmental boundaries, collaboration and a high-quality training programme. [7-9]

A recent study of McConnell *et al.* (2013) shows that patient outcomes can be improved by a lean management system. [10] Yet, little is known about the barriers and facilitators - defined as factors that influence lean implementation - that are encountered during the implementation of lean within hospital settings. [11-13] Various psychology studies and studies of patient safety education have shown that 40 to 50% of the intended actions after training are never executed or are only partially implemented. [14, 15] This finding may also apply to the outcomes of a lean training programme (LTP). However, few studies have discussed the barriers and facilitators that may be encountered in follow-up actions after an LTP in a hospital setting.

The aim of this paper is to provide insight into the barriers and facilitators that are encountered in implementing lean within clinical practices. This paper explores the experiences of team leaders after they attended an LTP to improve their management skills and behaviour to aid in the implementation of lean.

## METHODS

### Setting

The study was conducted at the VU University Medical Center (VUmc), a 733-bed academic hospital located in Amsterdam, the Netherlands. The VUmc employs 5,610 full-time staff operating within a current budget of €301 million. In 2010, the VUmc had 27,096 admissions performed 24,729 outpatient treatments and received 322,696 visits to its outpatient units, of which 122,120 were first contacts. The Dutch Institute for Accreditation in Healthcare (NIAZ) accredited the VUmc by an external audit in the fall of 2010. Subsequently, the VUmc adopted lean as a philosophy for continuous improvement. Roth (2006) describes lean as: "lean is not a program or an outcome, nor does it reside at an executive level or within the workforce. Lean is a way of operating that spans from executive strategy setting for developing people and managing business growth to the commitment of the workforce to continuous improvement". [16]

1  
2  
3 During the first wave of lean implementation, after careful debate and commitment from  
4 hospital leadership, the selected pilot departments included two surgery wards, the operating theatre of  
5 the VUmc and an affiliated outpatient psychiatry clinic. Subsequently, each of the 35 team leaders of  
6 these departments, who were targeted as key players, participated in a four-day LTP. In this study, we  
7 understood leaders to be those people who were team leader by occupation with a minimum of  
8 3 years of experience. The total programme consisted of 16 hours of plenary and group sessions that  
9 were led by various lean experts. The aim of the LTP was to increase the team leaders' knowledge and  
10 skills concerning lean management, with the central goal of transforming these skills and knowledge  
11 into leadership behaviours in day-to-day practice. The key themes included 1] an introduction to lean  
12 thinking and working, 2] management by standards, 3] solving problems and 4] lean leadership. The  
13 learning goals of each theme are displayed in Table 1.  
14  
15  
16  
17  
18  
19  
20  
21  
22  
23  
24  
25  
26  
27  
28  
29  
30  
31  
32  
33  
34  
35  
36  
37  
38  
39  
40  
41  
42  
43  
44  
45  
46  
47  
48  
49  
50  
51  
52  
53  
54  
55  
56  
57  
58  
59  
60

**Table 1. The key themes and the content of the four-day LTP.**

| Key themes                                   | Content of LTP                                                                                                                                                                                                                              |
|----------------------------------------------|---------------------------------------------------------------------------------------------------------------------------------------------------------------------------------------------------------------------------------------------|
| 1. Introduction to lean thinking and working | <ul style="list-style-type: none"> <li>- What is lean? The VUmc definition</li> <li>- The different types of waste</li> <li>- Learning to recognise waste</li> <li>-Operational management as a driver of continuous improvement</li> </ul> |
| 2. Management by standards                   | <ul style="list-style-type: none"> <li>- How to formulate metrics/critical process indicators</li> <li>- The use of visual management</li> <li>- 5S as a lean tool</li> <li>- Stand-ups as a daily routine</li> </ul>                       |
| 3. Solving problems                          | <ul style="list-style-type: none"> <li>- The benefits of standardisation</li> <li>- Asking the appropriate questions for problem solving</li> </ul>                                                                                         |
| 4. Lean leadership                           | <ul style="list-style-type: none"> <li>- What is lean leadership?</li> <li>- A leader's standard work</li> </ul>                                                                                                                            |

At the end of the LTP, all participants were asked to formulate at least one action point for improving their work using lean as an improvement philosophy.

### **Qualitative study approach**

A qualitative study approach was chosen to elicit in-depth insight into the perspectives of the participants concerning the barriers and facilitators that they encountered after the LTP, as qualitative research methods are helpful in addressing matters that concern organisational behaviour. [17]

Moreover, a study concerning employee perspectives requires a qualitative approach to enhance understanding of the context, personal experiences and interpretations of participants.

### Participants

The participants were selected for an interview if they formulated at least one action point for improvement after completing the LTP. Eventually, 31 healthcare professionals, who were all the head of their team, with an average of 19.2 years of leadership experience, were selected. More than half (18) of the respondents were part of the operating theatre, one-third (9) belonged to the surgery ward and the remainder (4) were part of the mental hospital.

### Data collection

The participants were invited to a semi-structured, in-depth interview three months after the LTP. The semi-structured interviews allowed for new issues to be mentioned during the interview by the respondents. [18] Prior to conducting the interviews, we created an interview guide that contained open questions (Table 2).

**Table 2. Interview guide.**

|                                                                                                                                                                                                |
|------------------------------------------------------------------------------------------------------------------------------------------------------------------------------------------------|
| 1. What is your opinion of the lean training programme in which you have participated in terms of its content and organisation?                                                                |
| 2. What action did you envisage to execute as a result of the lean training?                                                                                                                   |
| 3. Have you succeeded in executing the envisaged action?                                                                                                                                       |
| 4. To what extent has the execution of the action been successful?                                                                                                                             |
| 5. Which factors facilitated the execution of your action?                                                                                                                                     |
| 6. To what extent have these facilitating factors contributed to the execution of your action?                                                                                                 |
| 7. Which factors obstructed the execution of your action?                                                                                                                                      |
| 8. To what extent have these various factors obstructed the execution of your action?                                                                                                          |
| 9. Have you already envisaged new actions that should be addressed by means of lean (whether or not they emerged from previously mentioned actions)? If yes, what actions are you considering? |

This guide provided consistency in the interviews, ensuring that the same general topics were addressed by each of the respondents. The respondents chose a favourable date, place and time for the interviews, which were conducted by the first author. Prior to the interview, the interviewees were informed about the anonymity and confidentiality of the information. The length of the interviews ranged from 23 to 84 minutes, and the interviews were audio recorded with permission from the interviewees. All recordings were transcribed literally (*ad verbatim*) prior to the data analysis.

### Data analysis

First, we investigated the extent to which actions were executed. The following categories were used: 1] fully executed, 2] partially executed and 3] not executed. An action was classified as

1  
2  
3 partially executed if a leader had taken action but had not yet reached the goal or if some of the  
4 required actions had not yet been taken thus far. Second, we investigated how the team leaders had  
5 experienced the lean programme. Experiences, barriers and facilitators were analysed with an  
6 inductive thematic analysis approach [19]. The first four interviews were used to capture key patterns,  
7 which were used to assign labels (codes) to text fragments (open coding). The data that were extracted  
8 from the text fragments were subsequently analysed using a constant comparison method. [20, 21]  
9 Subsequently, axial coding was used to develop a framework of categories that focused on the barriers  
10 and facilitators that summarised the raw data and conveyed the key themes and processes (Table 3).  
11 Axial coding assigns codes to categories. To ensure the reliability and accuracy of the data analysis,  
12 consistency checks were performed by two different researchers (the first and the second author). In  
13 addition, member checks of the results of the analysis with the respondents were performed to enhance  
14 the credibility of the findings.  
15  
16  
17  
18  
19  
20  
21

## 22 **RESULTS**

### 23 **Action points**

24 A total of 31 respondents indicated that they had taken action on 159 formulated action points (mean  
25 per respondent: 5.5), with 117 (74%) action points executed and 65 of those 117 (56% of all executed  
26 action points) fully executed. The executed action points included expanding lean knowledge, using  
27 lean tools (e.g., 5S, stand-ups, value stream mapping (VSM)), measuring key performance indicators,  
28 adjusting one's own work structure, learning to recognise waste, asking 'Why' five times, improving  
29 care processes/eliminating waste, giving co-workers time for improvement, involving senior  
30 management, improving the culture, and educating colleagues about lean. Some respondents (n=6)  
31 reported their future intended action points as a follow-up to the original executed action points that  
32 resulted from the LTP. Figure 1 provides an overview of the envisaged action points and the degree to  
33 which the actions were implemented.  
34  
35  
36  
37  
38  
39  
40

41 [Figure 1 here]  
42  
43

### 44 **Experiences with the lean training programme**

45 In general, the majority of the participants experienced the LTP as helpful; they indicated that  
46 they had acquired new skills that were necessary for lean thinking and working. These skills had been  
47 taught during LTP training exercises, which were rated as valuable by the majority of the respondents.  
48 However, although this 'learning by doing' during the training sessions was beneficial, some  
49 respondents noted that 'training on the job' might result in better outcomes: this could be linked to the  
50 finding that most participants found it difficult to apply the acquired skills and knowledge in their  
51 jobs. Some participants stated that the workplace environment was a significant factor that influenced  
52 the extent of this training transfer to the workplace.  
53  
54  
55  
56  
57

58 The majority of the respondents suggested that lean coach interventions (e.g., consultation,  
59  
60



1  
2  
3 observation, coaching) between the four half-day training sessions may be helpful to transfer the  
4 acquired skills and knowledge to their actual work practices. The respondents also suggested a pre-  
5 course briefing with each participant's manager as a means of initiating a discussion on how to apply  
6 the principles, techniques and skills that were learned after they returned from training. One  
7 participant stated that "a pre-course briefing sends a powerful message that the organization is serious  
8 about seeing the benefits of training." Another suggestion was to introduce the programme or deliver  
9 one or more components of the programme to the participants' supervisors or managers. These  
10 suggestions were motivated by the difficulty of executing the intended actions after the LTP, as  
11 reported by the respondents. One respondent stated that "if the training programme does not ultimately  
12 change workplace behaviour, then the money and time spent on training is simply wasted."

13  
14  
15  
16  
17  
18 Most participants actively engaged in the subject matter because they recognized the purpose of  
19 learning lean. The organisational objectives of the programme were clearly described to the  
20 participants at the beginning of the programme. This information was experienced as helpful in  
21 showing how the programme related directly to the day-to-day work of the participants. Nevertheless,  
22 one participant stated that her new role expectations after the training programme were not clearly  
23 communicated to her: "I was left wondering why my superior nominated me for the programme."

24  
25  
26  
27  
28 The participants also appreciated the interpersonal interaction in the training, in which goals and  
29 aspirations were shared, experiences were discussed and work practices were demonstrated. The  
30 participants explained that these interactions resulted in shared learning between the LTP participants  
31 in their workplace.

32  
33  
34  
35  
36  
37  
38  
39  
40  
41  
42  
43  
44  
45  
46  
47  
48  
49  
50  
51  
52  
53  
54  
55  
56  
57  
58  
59  
60  
Despite the positive evaluation, some respondents experienced challenges concerning the timing  
of the LTP. These respondents would have preferred to attend the LTP in the morning or afternoon  
rather than in the early evening, given the low level of alertness after a day of work. Furthermore,  
some respondents proposed reading and exercises between meetings to prepare for the training  
programme.

### **Perceived barriers and facilitators**

Barriers and facilitators were defined as factors that influence the implementation of lean from the  
perspectives of participants. The participants addressed issues that were primarily related to internal  
organisation and leadership. Occasionally, the participants cited environmental factors; however, these  
factors were not considered in the analysis because organisations and leaders have little control over  
them when implementing lean.

#### *Senior management support and commitment*

The participants noted that it is important for lean implementation that team leaders, supervisors and  
management exemplify the desired behaviour. Participants characterised this behaviour as 'the support  
and commitment of senior management'. The *barrier* 'lack of management commitment' refers to

1  
2  
3 whether top management was involved in lean implementation, spent time in the workplace to  
4 supervise the process as part of their support, and provided the necessary resources to implement lean  
5 in the workplace. One participant offered the following explanation: “The problem is that top  
6 management sits in their ivory towers. They trust that everything will work out fine on the work floor.  
7 I think there is too much distance between management and their teams because they are always busy,  
8 busy, busy.” Another respondent stated the following: “I think that motivation is very important  
9 because if management stops giving support, lean will fall apart.” In contrast, the respondents who  
10 noted that leaders served as role models for the desired behaviour considered management support to  
11 be a *facilitator* of lean implementation.  
12  
13  
14  
15  
16

### 17 18 *Resources*

19 The respondents considered sufficient resources, such as time to make improvements, sufficient staff  
20 resources, and financial support for employee training, to be critical to a successful lean  
21 implementation. The majority of the respondents noted that the implementation was hindered by  
22 insufficient available time. One respondent stated that “one of the main barriers is time. That is the  
23 main hindrance. I find it very disappointing that after the training, you have a positive attitude towards  
24 change, but in your daily routine, you become rapidly consumed by day-to-day things, and then the  
25 intentions and training will fade away very easily.” Another respondent noted that getting staff  
26 released from workloads and other work pressures with dedication of time to make the necessary  
27 improvements, as well as the availability of an effective facilitator on the work floor are important  
28 success factors.  
29  
30  
31  
32  
33  
34  
35

### 36 37 *Strategy and purpose*

38 Important facilitators of lean implementation include a compelling vision and a clear and well-planned  
39 strategy. According to the participants of our study, objectives, purposes and goals must be evident for  
40 everyone involved. One participant stated that “senior management must know for sure what they  
41 want to achieve [with lean], how to achieve it, and know which aspects [for implementing change]  
42 must be taken into account.” The participants also agreed that a lack of integration of a lean strategy  
43 with the overall hospital strategy and other organisation-wide programmes is a major barrier.  
44  
45  
46  
47

### 48 49 *Resistance to change*

50 Several participants perceived their own staff’s lack of motivation to change as a barrier to lean  
51 implementation. Resistance to change is a significant problem in any improvement programme in any  
52 organisation; however, the participants of this study stated that resistance deserves special attention in  
53 lean implementation because staff empowerment is perceived as essential for engaging health care  
54 professionals. One respondent explained that “by empowering employees, team leaders can build on a  
55 nurturing environment in which employees can learn, improve and effectively implement goals.”  
56  
57  
58  
59  
60

### *Multidisciplinary collaboration*

A lack of multidisciplinary collaboration within a team was experienced as a barrier. Multidisciplinary collaboration requires teamwork. To function well, team members must work towards a common goal, communicate clearly with other team members, and understand one another's roles. Communication breakdowns appeared to increase because of cultural and organisational differences between professionals. Several participants noted that not all team members shared a common language for making sense of each other's actions. One participant stated the following: "The problems that demand a multidisciplinary approach are very frustrating problems. You are confronted with difficult collaboration [not the same understanding of each other's roles and communication problems] between physicians and operating staff."

### *Functional and professional silos*

Some participants indicated that the fragmentation of the care process into different professional and functional departments – silos – imposes a major barrier to the flow of patients, goods and information, and consequently to the implementation of lean techniques in the organisation. Silos can be important for accomplishing specific, focused tasks; however, although fragmentation in silos undoubtedly improves specific skills, some participants argued that this fragmentation presents a challenge in determining how to be effective while still maintaining professional competencies. One leader stated that "sometimes you experience problems outside your circle of influence, and then you are stuck with a problem because you have not established an infrastructure that reflects collaborative work with other departments." According to our respondents, the optimal means of interacting effectively across silos is to build personal connections and establish common goals as well as to support those people who are willing to reach across boundaries and celebrate successes.

### *Training and education*

The transfer of knowledge acquired from the LTP into practice was also perceived as a barrier. The participants cited the lack of knowing how to use lean tools in daily practices as a barrier. One participant said that "not knowing how to use lean tools, such as "5 Whys", is a barrier. You may try using the "5 Whys" tool to determine which area you can improve." Furthermore, the respondents pointed to their lack of experience in the principles, methods and tools of lean thinking. Many respondents suggested that coaching during implementation and site visits to other lean organisations (e.g. Scania, Toyota) would be helpful.

Table 3. Barriers to and facilitators of lean implementation.

| <b>Barrier/Facilitator</b>                      | <b>Meaning</b>                                                                                                                                                                                                                                                                                                                                                                                                                                                                                                |
|-------------------------------------------------|---------------------------------------------------------------------------------------------------------------------------------------------------------------------------------------------------------------------------------------------------------------------------------------------------------------------------------------------------------------------------------------------------------------------------------------------------------------------------------------------------------------|
| <b>Senior management support and commitment</b> | Leaders are important in acting as role models to exemplify the desired behaviours for lean implementation. As with all change and improvement programmes, support and commitment from senior management is critical to a lean initiative. The 'management commitment' barrier referred to whether top management was involved in lean implementation, spent time in the workplace to supervise the process as part of their support and provided the necessary resources to implement lean in the workplace. |
| <b>Resources</b>                                | Because the availability of resources is a primary concern in health care organisations, it must be properly considered when implementing lean. The 'resources' barrier has two meanings. The majority of the respondents mentioned that implementation was hindered because of insufficient available time. Others mentioned that a lack of personnel resources hindered the implementation.                                                                                                                 |
| <b>Strategy and purpose</b>                     | One of the drivers for the success of lean is to have a clear, well-communicated strategy. Constant changes in an improvement strategy inhibit the continuity of potentially successful programmes.                                                                                                                                                                                                                                                                                                           |
| <b>Resistance to change</b>                     | Resistance to change is a significant problem in any improvement programme in any organisation. Resistance deserves special attention from those attempting to implement lean because staff empowerment, which is a key issue in lean theory, is needed for engaging health care professionals.                                                                                                                                                                                                               |
| <b>Multidisciplinary collaboration</b>          | Collaboration (or the lack thereof) within a multi-disciplinary team was experienced as a barrier in most cases.                                                                                                                                                                                                                                                                                                                                                                                              |
| <b>Functional and professional silos</b>        | The fragmentation of health care organisations into silos (professional or functional) imposes a major barrier to the flow of patients, goods and information and consequently to the implementation of lean techniques in an organisation.                                                                                                                                                                                                                                                                   |
| <b>Training and education</b>                   | The successful implementation of lean requires employees to be effective problem solvers and learners, thereby eliminating errors and making operating improvements. The knowledge that is acquired in the LTP and the transfer of this knowledge into practice were perceived as constituting a barrier. Moreover, this barrier referred to the lack of experience in the principles, methods and tools of lean thinking and working.                                                                        |

## DISCUSSION

The purpose of this study was to investigate the experiences of hospital leaders (middle management) in implementing lean after attending an LTP. This study also aimed to provide further insight into the barriers and facilitators that may be encountered when implementing lean within a clinical practice. The results indicate that the involvement of top management and the creation of a shared learning environment are important factors in the successful implementation of lean; in addition, we observed a need for a holistic lean philosophy.

In general, the findings suggest that the daily presence of top management on the work floor is a key factor in the success of lean implementation. Most participants of our study experienced a lack of involvement of top management, and many wanted leaders to be present in daily settings more frequently and to function as role models. We feel that by doing so, leaders could increase ownership of the processes and encourage and empower employees to participate in lean. Previous studies of lean implementation have also reported a relationship between the success of lean implementation and management leadership behaviour. [21-26] Top management should be more involved and must take ownership of lean programmes. [27]

According to our study, a lack of vision and strategy regarding how to integrate lean with the overall hospital strategy is a major barrier to lean implementation. Lean implementation in the Dutch context began with techniques: leaders attempted to implement isolated parts of the lean system without understanding the entire philosophy. However, the literature has shown that lean philosophy and techniques require the adoption of the entire system in a holistic manner, rather than applying techniques in a piecemeal fashion. [28] The comments of our participants also indicate that LTPs might be more effective if they are established as a multi-dimensional activity: not merely creating a list of lean tools and methodologies and learning how to use them, but also applying a certain hierarchy. This means that to learn advanced tools or methodologies, people must first learn the basics and then build from there. We believe that achieving this hierarchical approach requires an understanding of all aspects of implementing lean. While some tools and methodologies can be presented in a classroom, others must include exercises or a practical portion of training to show the relation with other aspects of lean.

The findings of this study demonstrate that the participants experience challenges in applying the acquired knowledge in practice, and they articulated a need for training on the job. This is in keeping with the well-supported idea that some lean tools can, arguably, only be learned by applying them in real work situations, so-called 'learning by doing'. [23, 29-37] It may be hypothesised that the added value of "learning by doing" may lie in the dialogical process of sharing insights, knowledge and challenges, which gives context to lean procedures. This importance of dialogical learning in lean has also been addressed in other studies. [38] We suggest that mixing training on the job with a continuous learning environment – as suggested by our participants – may facilitate dialogical learning, encourage collaboration between colleagues and thus facilitate the transfer of learning goals

1  
2  
3 to daily practices.

4 The findings of our study show that sole attention for assigning 'appropriate' roles and rules,  
5 strategies and training programme, does not lead to improvement in the implementation of lean..  
6 According to the study participants, physicians and operating staff are highly trained individuals who  
7 act with autonomy, whereas lean culture requires teamwork and collaboration. [39, 40] Therefore,  
8 solely establishing an 'appropriate' hierarchy and a set of roles does not appear to be sufficient. In  
9 addition, acknowledgement of the complexity and ambiguities of daily practices in organisations,  
10 could enhance lean implementation. [41, 42] This implies leaders to focus more on the lean meaning-  
11 making process through several participants involved rather than on implementing lean solely as a  
12 fact.  
13  
14  
15  
16  
17  
18  
19

## 20 CONCLUSION

21 Implementing lean in a hospital setting is a challenge because of the ambiguous and complex  
22 environment of a highly professionalised organisation. This study investigated a wide range of barriers  
23 to and facilitators of lean implementation in a clinical setting. The study found that involvement of top  
24 management (e.g. consolidation of lean with the overall hospital strategy), the daily presence of  
25 leaders on the work floor and their function as a role model are important facilitators of lean  
26 implementation. To increase the successful outcomes of leadership intentions and actions, training  
27 should be supplemented with actions to remove perceived barriers, most of which are related to  
28 sufficient resources, such as time to make improvements. The successful implementation of lean  
29 actions by leaders requires the involvement of all professionals, the crossing of departmental  
30 boundaries and a focus on meaning-making processes rather than simply 'implementing' facts.  
31 Therefore, this research suggests that programme participants, such as staff members and leaders, can  
32 mutually explore the meanings of lean thinking and working for their own contexts. By entering this  
33 shared learning process (e.g., learning on the job) the ownership of lean implementation could also  
34 increase.  
35  
36  
37  
38  
39  
40  
41  
42  
43

## 44 Acknowledgements

45 KA is the principle researcher and was responsible for the design of the study. KA and FS conducted  
46 the data collection and were responsible for the data analysis. MV and GW supervised the study. All  
47 authors contributed to the writing of this paper and approved the final manuscript.  
48  
49  
50

## 51 Competing interests and funding

52 All authors have completed the ICMJE uniform disclosure form at [www.icmje.org/coi\\_disclosure.pdf](http://www.icmje.org/coi_disclosure.pdf)  
53 and declare: KA has received a research grant from LIDZ: a Dutch network for lean healthcare for the  
54 submitted work; non-financial relationships with any organizations that might have an interest in the  
55  
56  
57  
58  
59  
60

1  
2  
3  
4  
5  
6  
7  
8  
9  
10  
11  
12  
13  
14  
15  
16  
17  
18  
19  
20  
21  
22  
23  
24  
25  
26  
27  
28  
29  
30  
31  
32  
33  
34  
35  
36  
37  
38  
39  
40  
41  
42  
43  
44  
45  
46  
47  
48  
49  
50  
51  
52  
53  
54  
55  
56  
57  
58  
59  
60

submitted work in the previous three years; no other relationships or activities that could appear to have influenced the submitted work.

For peer review only

## References

- 1 Slobbe LCJ, Smit JM, Groen J, et al .Cost of Illness in the Netherlands 2007 : Trends in healthcare expenditure 1999-2010. Retrieved from The National Institute for Public Health and the Environment website:  
2 [http://www.rivm.nl/dsresource?objectid=rivmp:61294&type=org&disposition=inline&ns\\_nc=1](http://www.rivm.nl/dsresource?objectid=rivmp:61294&type=org&disposition=inline&ns_nc=1). Last  
3 accessed date: November 28<sup>th</sup> 2011
- 4 Al, MJ, Feenstra T, Brouwer WBF. Corrigendum to “Decision makers’ views on health care objectives and budget constraints: results from a pilot study”. *Health Policy* 2005;**74**:109–11.
- 5 Øvretveit, J. (2005). Leading improvement. *Journal of health organization and management*, *19*(6), 413-430.
- 6 Womack, J. P., & Jones, D. T. (2003). *Lean thinking: Banish waste and create wealth in your corporation* (First Free Press 2003 ed.). New York: Free Press.
- 7 Ben-Tovim DI. Seeing the picture through ‘lean thinking’. *BMJ*2007;**334**:169.
- 8 Radnor Z, Walley P, Stephens A, et al. Evaluation of the Lean Approach to BusinessManagement and its Use in the Public Sector. Edinburgh: The Scottish Government 2006.
- 9 Ballé M Régnier A. Lean as a learning system in a hospital ward. *Leadersh Health Serv* 2007;**20**:33–41.
- 10 de Souza LB, Pidd M. Exploring the barriers to lean health care implementation. *Public Money & Management* 2011;**31**:59–66.
- 11 Mazur L, McCreery J, Rothenberg L. Facilitating lean learning and behaviors in hospitals during the early stages of lean implementation. *Engineering Management Journal*2010;**24**:11–22.
- 12 McConnell, K. J., Lindrooth, R. C., Wholey, D. R., et al. Management Practices and the Quality of Care in Cardiac Units Management Practices in Cardiac Units. *JAMA internal medicine*, *173*(8), 684-692.
- 13 De Souza, L. B. (2009). Trends and approaches in lean healthcare. *Leadership in Health Services*, *22*(2), 121-139.
- 14 Robinson, S., Radnor, Z. J., Burgess, N., & Worthington, C. (2012). SimLean: Utilising simulation in the implementation of lean in healthcare. *European Journal of Operational Research*, *219*(1), 188-197.
- 15 Burgess, N., & Radnor, Z. (2013). Evaluating Lean in healthcare. *International journal of health care quality assurance*, *26*(3), 220-235.
- 16 Holland R, Meyers D. Creating champions for health care quality and safety. *Am J Med Qual* 2010;**25**:102–8.
- 17 Salanova M, Schaufeli W, Martinez I, et al. How obstacles and facilitators predict academic performance: the mediating role of study burnout and engagement. *Anxiety Stress Coping*2010; **23**:53–70.
- 18 Roth, G. (2006, May). Distributing leadership practices for lean transformation. *Reflections: The*



1  
2  
3 *SoL Journal* , 7 (2), pp. 15-29.

4 17 Ehigie BO, Ehigie RI. Applying qualitative methods in organizations: A note for  
5 industrial/organizational psychologists. *Qual Rep*2005;**10**:621–38.

6 18 Lindlof TR, Taylor BC. Qualitative communication research methods,third edition. Thousand  
7 Oaks, CA: Sage2011.

8 19 Saldana, J. (2013). The coding manual for qualitative researchers. Sage, Londen, p.218.

9 20 Pope C, Ziebland S, Mays N. Qualitative research in health care. Analysing qualitative data. *BMJ*  
10 2000;**320**:114–6.

11 21 Boeije, HR. Analysis in Qualitative Research. London: SAGE Publications Ltd 2010

12 22 Bahensky JA, Roe J, Bolton R. Lean sigma—will it work for healthcare? *J HealthcInfManag*  
13 2005;**19**:39–44.

14 23 Fillingham D. Can lean save lives? *Leadersh Health Serv* 2007;**20**:231–41.

15 24 Aherne J. Think lean. *J NursManag*2007;**13**:13–5.

16 25 Massey L, Williams S. CAND0: implementing change in an NHS Trust. *Int J Public Sect*  
17 2005;**18**:330–49.

18 26 Nelson-Peterson D, Leppa C. Creating an environment for caring using lean principles of the  
19 Virginia Mason Production System. *J NursAdm*2007;**37**:287–93.

20 27 KotterJR. Leading change: Why transformation efforts fail.*Harv Bus Rev*2007;**85**: 96–103.

21 28 Womack JP, Jones DT. Beyond Toyota: How to root out waste and pursue  
22 perfection. *Harv Bus Rev*1996;**74**:140–58.

23 29 Dickson EW, Singh S, Cheung DS, et al. Application of lean manufacturing techniques in the  
24 emergency department. *J Emerg Med* 2008;**37**:177–182.

25 30 Kaplan G, Patterson S. Seeking perfection in healthcare. A case study in adopting Toyota  
26 Production System methods. *Healthc Exec* 2008;**23**:16–21.

27 31 Jimmerson C, Weber D, Sobek D. Reducing waste and errors: piloting lean principles at IHC. *J*  
28 *QualSaf* 2005;**31**:249–57.

29 32 Manos A, Sattler M, Alukal G. Make healthcare lean. *QualProg* 2006;**39**:24.

30 33 Aherne J. Think lean. *J NursManag* 2007;**13**:13–5.

31 34 EsainA,Williams S, Massey L. Combining planned and emergent change in a healthcare lean  
32 transformation. *Public Money Manage* 2008;**28**:21–6.

33 35 Panchak P. Lean health care? It works! *Ind Week* 2003;**252**:34–40.

34 36 Persoon T, Zaleski S, Frerichs J. Improving preanalytic processes using the principles of lean  
35 production (Toyota Production System). *Am J ClinPathol* 2006;**125**:16–25.

36 37 Achanga P, Shehab E, Roy R, et al. Critical success factors for lean implementation within  
37 SMEs.*Journal of Manufacturing Technology Management* 2006;**17**:460–71.

38 38 Martinez Leon HC, Temblador Perez MDC, Farris JA, et al.Integrating Six Sigma tools using  
39 team-learning processes. *International Journal of Lean Six Sigma* 2010;**3**:133–156.

- 1  
2  
3 39 Endsley S, Magill MK, Godfrey MM. Creating a lean practice. *FamPractManag* 2006;**13**:34–8.  
4  
5 40 Spear SJ. Fixing health care from the inside: teaching residents to heal broken delivery processes as  
6 they heal sick patients. *Acad Med* 2006;**81**:144–9.  
7  
8 41 Weick, KE. Sensemaking in Organizations, Thousand Oaks, California: SAGE Publications Inc  
9 1995  
10  
11 42 Czarniawska B. Emerging Institutions: Pyramids or Anthills? *Organization Studies* 2009;**30**:423-  
12 441.  
13  
14  
15  
16  
17  
18  
19  
20  
21  
22  
23  
24  
25  
26  
27  
28  
29  
30  
31  
32  
33  
34  
35  
36  
37  
38  
39  
40  
41  
42  
43  
44  
45  
46  
47  
48  
49  
50  
51  
52  
53  
54  
55  
56  
57  
58  
59  
60

1  
2  
3  
4  
5  
6  
7  
8  
9  
10  
11  
12  
13  
14  
15  
16  
17  
18  
19  
20  
21  
22  
23  
24  
25  
26  
27  
28  
29  
30  
31  
32  
33  
34  
35  
36  
37  
38  
39  
40  
41  
42  
43  
44  
45  
46  
47  
48  
49  
50  
51  
52  
53  
54  
55  
56  
57  
58  
59  
60

Figure 1. Overview of the envisaged and executed action points.

For peer review only

1  
2  
3  
4  
5  
6  
7  
8  
9  
10  
11  
12  
13  
14  
15  
16  
17  
18  
19  
20  
21  
22  
23  
24  
25  
26  
27  
28  
29  
30  
31  
32  
33  
34  
35  
36  
37  
38  
39  
40  
41  
42  
43  
44  
45  
46  
47  
48  
49  
50  
51  
52  
53  
54  
55  
56  
57  
58  
59  
60

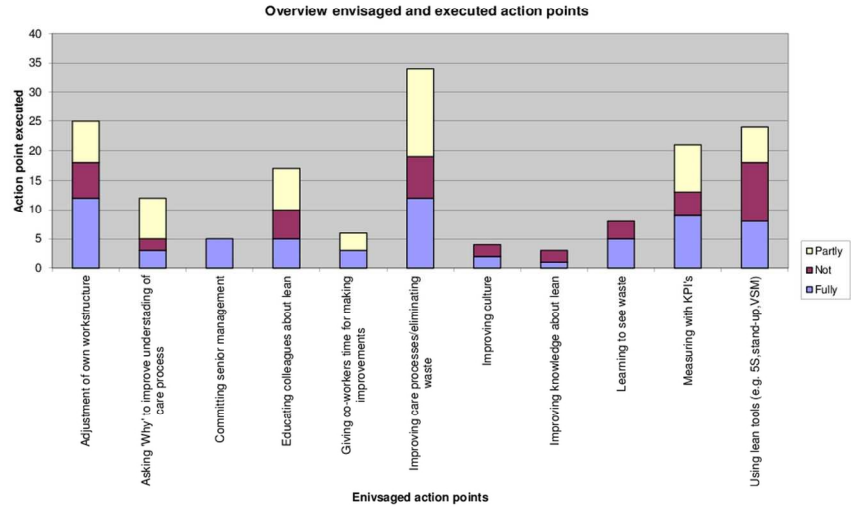

127x90mm (300 x 300 DPI)

view only

1  
2  
3  
4  
5  
6  
7 **Title: Experiences of Leaders in the Implementation of Lean in a Teaching Hospital: Barriers**  
8 **and Facilitators in Clinical Practices**  
9

10 **KH Aij, MBA, FE Simons, MSc, GAM Widdershoven, M Visse**  
11

12  
13 Kjeld Harald Aij MBA  
14 VU University Medical Center  
15 Department of Anaesthesiology & Operative Care  
16 De Boelelaan 1117 (6A12)  
17 1081 HV AMSTERDAM  
18 The Netherlands  
19 e-mail: [k.aj@vumc.nl](mailto:k.aj@vumc.nl)  
20 tel: +31204442156

21  
22 Frederique Elisabeth Simons MSc  
23 VU University Medical Center  
24 Department for Quality Improvement in Patient Care  
25 De Boelelaan 1117 (6A12)  
26 1081 HV AMSTERDAM  
27 The Netherlands  
28 [f.simons@vumc.nl](mailto:f.simons@vumc.nl)

29  
30 Prof. dr. Guy A.M. Widdershoven  
31 VU University Medical Center, EMGO+ Institute for Health and Care Research, Department of  
32 Medical Humanities  
33 Van der Boechorstraat 7  
34 1081 BT Amsterdam  
35 The Netherlands  
36 [g.widdershoven@vumc.nl](mailto:g.widdershoven@vumc.nl)

37  
38 Dr. Merel Visse  
39 VU University Medical Center, EMGO+ Institute for Health and Care Research, Department of  
40 Medical Humanities  
41 Van der Boechorstraat 7  
42 1081 BT Amsterdam  
43 The Netherlands  
44 [m.visse@vumc.nl](mailto:m.visse@vumc.nl)

45 Keywords: lean, barriers, facilitators, training, implementation  
46

47 Word count: 3-599.472 (excluding title page, abstract, article summary, references, figures and  
48 ~~tablestables~~ excluded)  
49  
50  
51  
52  
53  
54  
55  
56  
57  
58  
59  
60

## Abstract

### Objectives

To date, experiences of leaders in the implementation of lean after a lean training programme have not been systematically investigated within teaching hospitals. Existing studies have identified barriers and facilitators only from an improvement programme perspective and have not considered the [meaning of leadership for participants experiences of leaders themselves](#). This study aims to bridge this gap.

### Design

Semi-structured, in-depth interviews.

### Setting

One of largest teaching hospitals in the Netherlands.

### Participants

31 medical, surgical, and nursing professionals with an average of 19.2 years of supervisory experience. All professionals were appointed to a Lean Training Programme and were directly involved in the implementation of lean.

### Results

The evidence obtained in this study shows that, [from the perspectives of participants](#), leadership management support, a continuous learning environment, and cross-departmental cooperation play a significant role in successful lean implementation. The results suggest that a lean training programme contributed to positive outcomes in personal and professional skills that were evident during the first four months after programme completion.

### Conclusion

Implementing lean in a teaching hospital setting is a challenge because of the ambiguous and complex environment of a highly professionalised organisation. The study found that leadership management support and a continuous learning environment are important facilitators of lean implementation. To increase the successful outcomes of leadership actions, training should be supplemented with actions to remove perceived barriers. This requires the involvement of all professionals, the crossing of departmental boundaries and a focus on meaning-making processes rather than simply 'implementing' facts. Therefore, this research suggests that programme participants, such as staff members and leaders, can mutually explore the meanings of lean thinking and working for their own contexts. By entering this shared learning process (e.g., learning on the job) the ownership of lean implementation could also increase.

1  
2  
3  
4  
5  
6  
7  
8  
9  
10  
11  
12  
13  
14  
15  
16  
17  
18  
19  
20  
21  
22  
23  
24  
25  
26  
27  
28  
29  
30  
31  
32  
33  
34  
35  
36  
37  
38  
39  
40  
41  
42  
43  
44  
45  
46  
47  
48  
49  
50  
51  
52  
53  
54  
55  
56  
57  
58  
59  
60

## Article Summary

### Article focus

- To investigate experiences of leaders in the implementation of lean after a lean training programme within teaching hospitals
- To provide further insight into the barriers and facilitators that may be encountered when implementing lean within a clinical practice.

### Key messages

- The study found that leadership management support and a continuous learning environment are important facilitators of lean implementation.
- The successful implementation of lean actions by leaders requires the involvement of all professionals, the crossing of departmental boundaries and a focus on meaning-making processes rather than simply 'implementing' facts.
- To increase the successful outcomes of leadership actions, training should be supplemented with actions to remove perceived barriers, most of which are related to the organisational and social context of leaders.

### Strengths and limitations of this study

- We acquired detailed records of leader experiences in clinical practices
- This was a qualitative study whose purpose was to explore experiences of leaders in the implementation of lean in a teaching hospital; further multiple-centre studies are necessary to show causal links
- Most outcome measures of this study are self-reported and may be influenced by information or recall bias

## INTRODUCTION

Lean improvements have been initiated in hospitals throughout the world for the benefit of patients, employees and hospital organisations. In the Netherlands, budget constraints and the growing patient population have urged healthcare organisations to improve efficiency and reduce costs while maintaining quality. [1, 2] In addition, the focus on the quality of patient care has been increased by health inspectorate accreditation organisations. As a result of this focus, health care leaders need to focus on efficient, patient-centred operations and continuous quality improvements. [3] One possible way to achieve this is by implementing lean; however, an organisation cannot become lean overnight: lean projects in other industries have shown that the application of lean practices requires perseverance and top-down commitment combined with bottom-up implementation. [4, 5, 6] These requirements imply the crossing of departmental boundaries, collaboration and a high-quality training programme. [7-9]

[A recent study of McConnell \*et al.\* \(2013\) shows that patient outcomes can be improved by a lean management system. \[10\]](#) Yet, little is known about the barriers and facilitators - defined as factors that influence lean implementation - that are encountered during the implementation of lean within hospital settings. [11-13] Various psychology studies and studies of patient safety education have shown that 40 to 50% of the intended actions after training are never executed or are only partially implemented. [14, 15] This finding may also apply to the outcomes of a lean training programme (LTP). However, few studies have discussed the barriers and facilitators that may be encountered in follow-up actions after an LTP in a hospital setting.

The aim of this paper is to provide insight into the barriers and facilitators that are encountered in implementing lean within clinical practices. This paper explores the experiences of team leaders after they attended an LTP to improve their management skills and behaviour to aid in the implementation of lean.

## METHODS

### Setting

The study was conducted at the VU University Medical Center (VUmc), a 733-bed academic hospital located in Amsterdam, the Netherlands. The VUmc employs 5,610 full-time staff operating within a current budget of €301 million. In 2010, the VUmc had 27,096 admissions performed 24,729 outpatient treatments and received 322,696 visits to its outpatient units, of which 122,120 were first contacts. The Dutch Institute for Accreditation in Healthcare (NIAZ) accredited the VUmc by an external audit in the fall of 2010. Subsequently, the VUmc adopted lean as a philosophy for continuous improvement. Roth (2006) describes lean as: "lean is not a program or an outcome, nor does it reside at an executive level or within the workforce. Lean is a way of operating that spans from executive strategy setting for developing people and managing business growth to the commitment of the workforce to continuous improvement". [16]



1  
2  
3  
4  
5  
6  
7  
8  
9  
10  
11  
12  
13  
14  
15  
16  
17  
18  
19  
20  
21  
22  
23  
24  
25  
26  
27  
28  
29  
30  
31  
32  
33  
34  
35  
36  
37  
38  
39  
40  
41  
42  
43  
44  
45  
46  
47  
48  
49  
50  
51  
52  
53  
54  
55  
56  
57  
58  
59  
60

During the first wave of lean implementation, after careful debate and commitment from hospital leadership, the selected pilot departments included two surgery wards, the operating theatre of the VUmc and an affiliated outpatient psychiatry clinic. Subsequently, each of the 35 team leaders of these departments, who were targeted as key players, participated in a four-day LTP. [In this study, we understood leaders to be those people who were team leader by occupation with a minimum of 3 years of experience.](#) The total programme consisted of 16 hours of plenary and group sessions that were led by various lean experts. The aim of the LTP was to increase the team leaders' knowledge and skills concerning lean management, with the central goal of transforming these skills and knowledge into leadership behaviours in day-to-day practice. The key themes included 1] an introduction to lean thinking and working, 2] management by standards, 3] solving problems and 4] lean leadership. The learning goals of each theme are displayed in Table 1.

Table 1. The key themes and the content of the four-day LTP.

| Key themes                                   | Content of LTP                                                                                                                                                                                                                               |
|----------------------------------------------|----------------------------------------------------------------------------------------------------------------------------------------------------------------------------------------------------------------------------------------------|
| 1. Introduction to lean thinking and working | <ul style="list-style-type: none"> <li>- What is lean? The VUmc definition</li> <li>- The different types of waste</li> <li>- Learning to recognise waste</li> <li>- Operational management as a driver of continuous improvement</li> </ul> |
| 2. Management by standards                   | <ul style="list-style-type: none"> <li>- How to formulate metrics/critical process indicators</li> <li>- The use of visual management</li> <li>- 5S as a lean tool</li> <li>- Stand-ups as a daily routine</li> </ul>                        |
| 3. Solving problems                          | <ul style="list-style-type: none"> <li>- The benefits of standardisation</li> <li>- Asking the appropriate questions for problem solving</li> </ul>                                                                                          |
| 4. Lean leadership                           | <ul style="list-style-type: none"> <li>- What is lean leadership?</li> <li>- A leader's standard work</li> </ul>                                                                                                                             |

At the end of the LTP, all participants were asked to formulate at least one action point for improving their work using lean as an improvement philosophy.

#### Qualitative study approach

A qualitative study approach was chosen to elicit in-depth insight into the perspectives of the participants concerning the barriers and facilitators that they encountered after the LTP, as qualitative research methods are helpful in addressing matters that concern organisational behaviour. [4617]

Moreover, a study concerning employee perspectives requires a qualitative approach to enhance understanding of the context, personal experiences and interpretations of participants.

### Participants

The participants were selected for an interview if they formulated at least one action point for improvement after completing the LTP. Eventually, ~~34~~ 31 healthcare professionals, who were all the head of their team, with an average of 19.2 years of leadership experience, were selected. More than half (18) of the respondents were part of the operating theatre, one-third (9) belonged to the surgery ward and the remainder (4) were part of the mental hospital.

### Data collection

The participants were invited to a semi-structured, in-depth interview three months after the LTP. The semi-structured interviews allowed for new issues to be mentioned during the interview by the respondents. [1718] Prior to conducting the interviews, we created an interview guide that contained open questions (Table 2).

**Table 2. Interview guide.**

|                                                                                                                                                                                                |
|------------------------------------------------------------------------------------------------------------------------------------------------------------------------------------------------|
| 1. What is your opinion of the lean training programme in which you have participated in terms of its content and organisation?                                                                |
| 2. What action did you envisage to execute as a result of the lean training?                                                                                                                   |
| 3. Have you succeeded in executing the envisaged action?                                                                                                                                       |
| 4. To what extent has the execution of the action been successful?                                                                                                                             |
| 5. Which factors facilitated the execution of your action?                                                                                                                                     |
| 6. To what extent have these facilitating factors contributed to the execution of your action?                                                                                                 |
| 7. Which factors obstructed the execution of your action?                                                                                                                                      |
| 8. To what extent have these various factors obstructed the execution of your action?                                                                                                          |
| 9. Have you already envisaged new actions that should be addressed by means of lean (whether or not they emerged from previously mentioned actions)? If yes, what actions are you considering? |

This guide provided consistency in the interviews, ensuring that the same general topics were addressed by each of the respondents. The respondents chose a favourable date, place and time for the interviews, which were conducted by the first author. Prior to the interview, the interviewees were informed about the anonymity and confidentiality of the information. The length of the interviews ranged from 23 to 84 minutes, and the interviews were audio recorded with permission from the interviewees. All recordings were transcribed literally (*ad verbatim*) prior to the data analysis.

### Data analysis

First, we investigated the extent to which actions were executed. The following categories were used: 1] fully executed, 2] partially executed and 3] not executed. An action was classified as

1  
2  
3  
4  
5  
6  
7 partially executed if a leader had taken action but had not yet reached the goal or if some of the  
8 required actions had not yet been taken thus far. Second, we investigated how the team leaders had  
9 experienced the lean programme. Experiences, barriers and facilitators were analysed with an  
10 inductive ~~content-thematic~~ analysis approach [1819]. The first four interviews were used to capture key  
11 patterns, which were used to assign labels (*codes*) to text fragments (open coding). The data that were  
12 extracted from the text fragments were subsequently analysed using a constant comparison method.  
13 [1920, 2021] Subsequently, axial coding was used to develop a framework of categories that focused  
14 on the barriers and facilitators that summarised the raw data and conveyed the key themes and  
15 processes (Table 3). Axial coding assigns codes to categories. To ensure the reliability and accuracy of  
16 the data analysis, consistency checks were performed by two different researchers (the first and the  
17 second author). In addition, member checks of the results of the analysis with the respondents were  
18 performed to enhance the credibility of the findings. ~~Subsequently, axial coding was used to develop a~~  
19 ~~framework of categories that focused on the barriers and facilitators that summarised the raw data and~~  
20 ~~conveyed the key themes and processes (Table 3).~~

## 26 RESULTS

### 27 Action points

28 A total of 31 respondents indicated that they had taken action on 159 formulated action points (mean  
29 per respondent: 5.5), with 117 (74%) action points executed and 65 of those 117 (56% of all executed  
30 action points) fully executed. The executed action points included expanding lean knowledge, using  
31 lean tools (e.g., 5S, stand-ups, value stream mapping (VSM)), measuring key performance indicators,  
32 adjusting one's own work structure, learning to recognise waste, asking 'Why' five times, improving  
33 care processes/eliminating waste, giving co-workers time for improvement, involving senior  
34 management, improving the culture, and educating colleagues about lean. Some respondents (n=6)  
35 reported their future intended action points as a follow-up to the original executed action points that  
36 resulted from the LTP. Figure 1 provides an overview of the envisaged action points and the degree to  
37 which the actions were implemented.

38 [Figure 1 here]

### 44 Experiences with the lean training programme

45 In general, the majority of the participants experienced the LTP as helpful; they indicated that  
46 they had acquired new skills that were necessary for lean thinking and working. These skills had been  
47 taught during LTP training exercises, which were rated as valuable by the majority of the respondents.  
48 However, although this 'learning by doing' during the training sessions was beneficial, some  
49 respondents noted that 'training on the job' might result in better outcomes: this could be linked to the  
50 finding that most participants found it difficult to apply the acquired skills and knowledge in their  
51 jobs. Some participants stated that the workplace environment was a significant factor that influenced  
52  
53  
54  
55  
56  
57  
58  
59  
60

1  
2  
3  
4  
5  
6  
7 the extent of this training transfer to the workplace.

8 The majority of the respondents suggested that lean coach interventions (e.g., consultation,  
9 observation, coaching) between the four half-day training sessions may be helpful to transfer the  
10 acquired skills and knowledge to their actual work practices. The respondents also suggested a pre-  
11 course briefing with each participant's manager as a means of initiating a discussion on how to apply  
12 the principles, techniques and skills that were learned after they returned from training. One  
13 participant stated that "a pre-course briefing sends a powerful message that the organization is serious  
14 about seeing the benefits of training." Another suggestion was to introduce the programme or deliver  
15 one or more components of the programme to the participants' supervisors or managers. These  
16 suggestions were motivated by the difficulty of executing the intended actions after the LTP, as  
17 reported by the respondents. One respondent stated that "if the training programme does not ultimately  
18 change workplace behaviour, then the money and time spent on training is simply wasted."

19 Most participants actively engaged in the subject matter because they recognized the purpose of  
20 learning lean. The organisational objectives of the programme were clearly described to the  
21 participants at the beginning of the programme. This information was experienced as helpful in  
22 showing how the programme related directly to the day-to-day work of the participants. Nevertheless,  
23 one participant stated that her new role expectations after the training programme were not clearly  
24 communicated to her: "I was left wondering why my superior nominated me for the programme."

25 The participants also appreciated the interpersonal interaction in the training, in which goals and  
26 aspirations were shared, experiences were discussed and work practices were demonstrated. The  
27 participants explained that these interactions resulted in shared learning between the LTP participants  
28 in their workplace.

29 Despite the positive evaluation, some respondents experienced challenges concerning the timing  
30 of the LTP. These respondents would have preferred to attend the LTP in the morning or afternoon  
31 rather than in the early evening, given the low level of alertness after a day of work. Furthermore,  
32 some respondents proposed reading and exercises between meetings to prepare for the training  
33 programme.

#### 34 35 36 37 38 39 40 41 42 43 **Perceived barriers and facilitators**

44 Barriers and facilitators were defined as factors that influence the implementation of lean from the  
45 perspectives of participants. The participants addressed issues that were primarily related to internal  
46 organisation and leadership. Occasionally, the participants cited environmental factors; however, these  
47 factors were not considered in the analysis because organisations and leaders have little control over  
48 them when implementing lean.

#### 49 50 51 52 53 *Senior management support and commitment*

1  
2  
3  
4  
5  
6  
7 The participants noted that it is important for lean implementation that team leaders, supervisors and  
8 management exemplify the desired behaviour. Participants characterised this behaviour as ‘the support  
9 and commitment of senior management’. The *barrier* ‘lack of management commitment’ refers to  
10 whether top management was involved in lean implementation, spent time in the workplace to  
11 supervise the process as part of their support, and provided the necessary resources to implement lean  
12 in the workplace. One participant offered the following explanation: “The problem is that top  
13 management sits in their ivory towers. They trust that everything will work out fine on the work floor.  
14 I think there is too much distance between management and their teams because they are always busy,  
15 busy, busy.” Another respondent stated the following: “I think that motivation is very important  
16 because if management stops giving support, lean will fall apart.” In contrast, the respondents who  
17 noted that leaders served as role models for the desired behaviour considered management support to  
18 be a *facilitator* of lean implementation.  
19  
20  
21  
22

#### 23 *Resources*

24 The respondents considered sufficient resources, such as time to make improvements, sufficient staff  
25 resources, and financial support for employee training, to be critical to a successful lean  
26 implementation. The majority of the respondents noted that the implementation was hindered by  
27 insufficient available time. One respondent stated that “one of the main barriers is time. That is the  
28 main hindrance. I find it very disappointing that after the training, you have a positive attitude towards  
29 change, but in your daily routine, you become rapidly consumed by day-to-day things, and then the  
30 intentions and training will fade away very easily.” [Another respondent noted that getting staff  
31 released from workloads and other work pressures with dedication of time to make the necessary  
32 improvements, as well as the availability of an effective facilitator on the work floor are important  
33 success factors.](#)  
34  
35  
36  
37  
38

#### 39 *Strategy and purpose*

40 Important facilitators of lean implementation include a compelling vision and a clear and well-planned  
41 strategy. According to the participants of our study, objectives, purposes and goals must be evident for  
42 everyone involved. One participant stated that “senior management must know for sure what they  
43 want to achieve [with lean], how to achieve it, and know which aspects [for implementing change]  
44 must be taken into account.” The participants also agreed that a lack of integration of a lean strategy  
45 with the overall hospital strategy and other organisation-wide programmes is a major barrier.  
46  
47  
48  
49

#### 50 *Resistance to change*

51 Several participants perceived their own staff’s lack of motivation to change as a barrier to lean  
52 implementation. Resistance to change is a significant problem in any improvement programme in any  
53 organisation; however, the participants of this study stated that resistance deserves special attention in  
54  
55  
56  
57  
58  
59  
60

1  
2  
3  
4  
5  
6  
7 lean implementation because staff empowerment is perceived as essential for engaging health care  
8 professionals. One respondent explained that “by empowering employees, team leaders can build on a  
9 nurturing environment in which employees can learn, improve and effectively implement goals.”  
10

#### 11 *Multidisciplinary collaboration*

12 A lack of multidisciplinary collaboration within a team was experienced as a barrier. Multidisciplinary  
13 collaboration requires teamwork. To function well, team members must work towards a common goal,  
14 communicate clearly with other team members, and understand one another’s roles. Communication  
15 breakdowns appeared to increase because of cultural and organisational differences between  
16 professionals. Several participants noted that not all team members shared a common language for  
17 making sense of each other’s actions. One participant stated the following: “The problems that  
18 demand a multidisciplinary approach are very frustrating problems. You are confronted with difficult  
19 collaboration [not the same understanding of each other’s roles and communication problems]  
20 between physicians and operating staff.”  
21  
22  
23  
24

#### 25 *Functional and professional silos*

26 Some participants indicated that the fragmentation of the care process into different professional and  
27 functional departments – silos – imposes a major barrier to the flow of patients, goods and  
28 information, and consequently to the implementation of lean techniques in the organisation. Silos can  
29 be important for accomplishing specific, focused tasks; however, although fragmentation in silos  
30 undoubtedly improves specific skills, some participants argued that this fragmentation presents a  
31 challenge in determining how to be effective while still maintaining professional competencies. One  
32 leader stated that “sometimes you experience problems outside your circle of influence, and then you  
33 are stuck with a problem because you have not established an infrastructure that reflects collaborative  
34 work with other departments.” According to our respondents, the optimal means of interacting  
35 effectively across silos is to build personal connections and establish common goals as well as to  
36 support those people who are willing to reach across boundaries and celebrate successes.  
37  
38  
39  
40  
41  
42

#### 43 *Training and education*

44 The transfer of knowledge acquired from the LTP into practice was also perceived as a barrier. The  
45 participants cited the lack of knowing how to use lean tools in daily practices as a barrier. One  
46 participant said that “not knowing how to use lean tools, such as “5 Whys”, is a barrier. You may try  
47 using the “5 Whys” tool to determine which area you can improve.” Furthermore, the respondents  
48 pointed to their lack of experience in the principles, methods and tools of lean thinking. Many  
49 respondents suggested that coaching during implementation and site visits to other lean organisations  
50 (e.g. Scania, Toyota) would be helpful.  
51  
52  
53  
54  
55  
56  
57  
58  
59  
60

Table 3. Barriers to and facilitators of lean implementation.

| Barrier/Facilitator                             | Meaning                                                                                                                                                                                                                                                                                                                                                                                                                                                                                                       |
|-------------------------------------------------|---------------------------------------------------------------------------------------------------------------------------------------------------------------------------------------------------------------------------------------------------------------------------------------------------------------------------------------------------------------------------------------------------------------------------------------------------------------------------------------------------------------|
| <i>Senior management support and commitment</i> | Leaders are important in acting as role models to exemplify the desired behaviours for lean implementation. As with all change and improvement programmes, support and commitment from senior management is critical to a lean initiative. The 'management commitment' barrier referred to whether top management was involved in lean implementation, spent time in the workplace to supervise the process as part of their support and provided the necessary resources to implement lean in the workplace. |
| <i>Resources</i>                                | Because the availability of resources is a primary concern in health care organisations, it must be properly considered when implementing lean. The 'resources' barrier has two meanings. The majority of the respondents mentioned that implementation was hindered because of insufficient available time. Others mentioned that a lack of personnel resources hindered the implementation.                                                                                                                 |
| <i>Strategy and purpose</i>                     | One of the drivers for the success of lean is to have a clear, well-communicated strategy. Constant changes in an improvement strategy inhibit the continuity of potentially successful programmes.                                                                                                                                                                                                                                                                                                           |
| <i>Resistance to change</i>                     | Resistance to change is a significant problem in any improvement programme in any organisation. Resistance deserves special attention from those attempting to implement lean because staff empowerment, which is a key issue in lean theory, is needed for engaging health care professionals.                                                                                                                                                                                                               |
| <i>Multidisciplinary collaboration</i>          | Collaboration (or the lack thereof) within a multi-disciplinary team was experienced as a barrier in most cases.                                                                                                                                                                                                                                                                                                                                                                                              |
| <i>Functional and professional silos</i>        | The fragmentation of health care organisations into silos (professional or functional) imposes a major barrier to the flow of patients, goods and information and consequently to the implementation of lean techniques in an organisation.                                                                                                                                                                                                                                                                   |
| <i>Training and education</i>                   | The successful implementation of lean requires employees to be effective problem solvers and learners, thereby eliminating errors and making operating improvements. The knowledge that is acquired in the LTP and the transfer of this knowledge into practice were perceived as constituting a barrier. Moreover, this barrier referred to the lack of experience in the principles, methods and tools of lean thinking and working.                                                                        |



## DISCUSSION

The purpose of this study was to investigate the experiences of hospital leaders (middle management) in implementing lean after attending an LTP. This study also aimed to provide further insight into the barriers and facilitators that may be encountered when implementing lean within a clinical practice. The results indicate that the involvement of top management and the creation of a shared learning environment are important factors in the successful implementation of lean; in addition, we observed a need for a holistic lean philosophy.

In general, the findings suggest that the daily presence of top management on the work floor is a key factor in the success of lean implementation. Most participants of our study experienced a lack of involvement of top management, and many wanted leaders to be present in daily settings more frequently and to function as role models. We feel that by doing so, leaders could increase ownership of the processes and encourage and empower employees to participate in lean. Previous studies of lean implementation have also reported a relationship between the success of lean implementation and management leadership behaviour. [2021-2526] Top management should be more involved and must take ownership of lean programmes. [2627]

According to our study, a lack of vision and strategy regarding how to integrate lean with the overall hospital strategy is a major barrier to lean implementation. Lean implementation in the Dutch context began with techniques: leaders attempted to implement isolated parts of the lean system without understanding the entire philosophy. However, the literature has shown that lean philosophy and techniques require the adoption of the entire system in a holistic manner, rather than applying techniques in a piecemeal fashion. [2728] The comments of our participants also indicate that LTPs might be more effective if they are established as a multi-dimensional activity: not merely creating a list of lean tools and methodologies and learning how to use them, but also applying a certain hierarchy. This means that to learn advanced tools or methodologies, people must first learn the basics and then build from there. We believe that achieving this hierarchical approach requires an understanding of all aspects of implementing lean. While some tools and methodologies can be presented in a classroom, others must include exercises or a practical portion of training to show the relation with other aspects of lean.

~~Some lean tools can, arguably, only be learned by applying them in real work situations, so-called 'learning by doing'. [22, 28-36]~~ The findings of this study demonstrate that the participants experience challenges in applying the acquired knowledge in practice, and they articulated a need for training on the job. This is in keeping with the well-supported idea that ~~Some lean tools can, arguably, only be learned by applying them in real work situations, so-called 'learning by doing'~~ [223, 289-367]. It may be hypothesised that the added value of "learning by doing" may lie in the dialogical process of sharing insights, knowledge and challenges, which gives context to lean procedures. This importance of dialogical learning in lean has also been addressed in other studies. [387]. We suggest that mixing training on the job with a continuous learning environment – as

1  
2  
3  
4  
5  
6  
7 suggested by our participants – may facilitate dialogical learning, encourage collaboration between  
8 colleagues and thus facilitate the transfer of learning goals to daily practices. However, lean gains  
9 meaning for specific contexts through the sharing of insights, knowledge and challenges, and the  
10 findings also support the need for a continuous learning environment in which insights and knowledge  
11 are shared. This dialogical process may encourage collaboration between colleagues and facilitate the  
12 transfer of learning goals to daily practices. Other studies have also addressed this importance of  
13 dialogical learning in lean.[37]. We suggest that mixing training on the job and continuous learning  
14 environment may facilitate dialogical learning.

15  
16  
17  
18  
19 \_\_\_\_\_ Studies have addressed the importance of leadership skills for creating cultures that promote  
20 sharing and creating knowledge. [38] These studies suggest that the foundation of such cultures entails  
21 empowerment, dialogue, collaboration and the establishment of a set of roles to perform knowledge-  
22 related tasks. By providing the ‘appropriate’ roles and rules, strategies and training programme, one  
23 expects improvement in the implementation of lean; however, the findings of our study contradict  
24 show that sole attention for assigning ‘appropriate’ roles and rules, strategies and training programme,  
25 does not lead to improvement in the implementation of lean. ~~this approach~~. According to the study  
26 participants, physicians and operating staff are highly trained individuals who act with autonomy,  
27 whereas lean culture requires teamwork and collaboration. [39, 40] Therefore, solely establishing an  
28 ‘appropriate’ hierarchy and a set of roles does not appear to be sufficient. ~~In a hospital setting,~~  
29 ~~multidisciplinary collaboration may lead to instrumental approaches to creating a learning~~  
30 ~~environment, and such approaches may hinder lean implementation. An alternative approach~~  
31 ~~In~~  
32 ~~addition, it could involve working from interpretative traditions in organisational studies. [41, 42]~~  
33 ~~These traditions~~ acknowledgement of the complexity and ambiguities of daily practices in  
34 organisations ~~and consider organisations to be relational and socially constructed environments, could~~  
35 ~~enhance lean implementation. [41, 42] This implies ]-~~ Within the dynamic hospital environment, lean  
36 can gain meaning gradually. Rather than something to be implemented, the meaning of lean can  
37 emerge slowly. Leaders ~~could to~~ focus more on the lean meaning-making process through several  
38 participants involved rather than on implementing lean solely as a fact.

## 44 45 CONCLUSION

46 Implementing lean in a hospital setting is a challenge because of the ambiguous and complex  
47 environment of a highly professionalised organisation. This study investigated a wide range of barriers  
48 to and facilitators of lean implementation in a clinical setting. The study found that leadership  
49 management support involvement of top management (e.g. consolidation of lean with the overall  
50 hospital strategy), the daily presence of leaders on the work floor and their function as a role model  
51 and a continuous learning environment are important facilitators of lean implementation. To increase  
52 the successful outcomes of leadership intentions and actions, training should be supplemented with  
53  
54  
55  
56  
57  
58  
59  
60

1  
2  
3  
4  
5  
6  
7  
8  
9  
10  
11  
12  
13  
14  
15  
16  
17  
18  
19  
20  
21  
22  
23  
24  
25  
26  
27  
28  
29  
30  
31  
32  
33  
34  
35  
36  
37  
38  
39  
40  
41  
42  
43  
44  
45  
46  
47  
48  
49  
50  
51  
52  
53  
54  
55  
56  
57  
58  
59  
60

actions to remove perceived barriers, most of which are related to [the organisational and social context of leaders](#), [sufficient resources, such as time to make improvements](#). The successful implementation of lean actions by leaders requires the involvement of all professionals, the crossing of departmental boundaries and a focus on meaning-making processes rather than simply ‘implementing’ facts. Therefore, this research suggests that programme participants, such as staff members and leaders, can mutually explore the meanings of lean thinking and working for their own contexts. By entering this shared learning process (e.g., learning on the job) the ownership of lean implementation could also increase.

### **Acknowledgements**

KA is the principle researcher and was responsible for the design of the study. KA and FS conducted the data collection and were responsible for the data analysis. MV and GW supervised the study. All authors contributed to the writing of this paper and approved the final manuscript.

### **Competing interests and funding**

All authors have completed the ICMJE uniform disclosure form at [www.icmje.org/coi\\_disclosure.pdf](http://www.icmje.org/coi_disclosure.pdf) and declare: KA has received a research grant from LIDZ: a Dutch network for lean healthcare for the submitted work; non-financial relationships with any organizations that might have an interest in the submitted work in the previous three years; no other relationships or activities that could appear to have influenced the submitted work.

## References

- 1 Slobbe LCJ, Smit JM, Groen J, Poos MJJC, Kommer GJ. Cost of Illness in the Netherlands 2007 : Trends in healthcare expenditure 1999-2010. Retrieved from The National Institute for Public Health and the Environment website: [http://www.rivm.nl/dsresource?objectid=rivmp:61294&type=org&disposition=inline&ns\\_nc=1](http://www.rivm.nl/dsresource?objectid=rivmp:61294&type=org&disposition=inline&ns_nc=1). Last accessed date: November 28<sup>th</sup> 2011
- 2 Al, MJ, Feenstra T, Brouwer WBF. Corrigendum to “Decision makers’ views on health care objectives and budget constraints: results from a pilot study”. *Health Policy* 2005;**74**:109–11.
- 3 Øvretveit, J. (2005). Leading improvement. *Journal of health organization and management*, *19*(6), 413-430.
- 4 Womack, J. P., & Jones, D. T. (2003). *Lean thinking: Banish waste and create wealth in your corporation* (First Free Press 2003 ed.). New York: Free Press.
- 5 Ben-Tovim DI. Seeing the picture through ‘lean thinking’. *BMJ*2007;**334**:169.
- 6 Radnor Z, Walley P, Stephens A, et al. Evaluation of the Lean Approach to Business Management and its Use in the Public Sector. Edinburgh: The Scottish Government 2006.
- 7 Ballé M Régnier A. Lean as a learning system in a hospital ward. *Leadersh Health Serv* 2007;**20**:33–41.
- 8 de Souza LB, Pidd M. Exploring the barriers to lean health care implementation. *Public Money & Management* 2011;**31**:59–66.
- 9 Mazur L, McCreery J, Rothenberg L. Facilitating lean learning and behaviors in hospitals during the early stages of lean implementation. *Engineering Management Journal*2010;**24**:11–22.
- ~~10~~10 McConnell, K. J., Lindrooth, R. C., Wholey, D. R., Maddox, T. M., & Bloom, N. (2013). Management Practices and the Quality of Care in Cardiac Units. *Management Practices in Cardiac Units*. *JAMA internal medicine*, *173*(8), 684-692.
- ~~11~~11 De Souza, L. B. (2009). Trends and approaches in lean healthcare. *Leadership in Health Services*, *22*(2), 121-139.
- ~~12~~12 Robinson, S., Radnor, Z. J., Burgess, N., & Worthington, C. (2012). SimLean: Utilising simulation in the implementation of lean in healthcare. *European Journal of Operational Research*, *219*(1), 188-197.
- ~~13~~13 Burgess, N., & Radnor, Z. (2013). Evaluating Lean in healthcare. *International journal of health care quality assurance*, *26*(3), 220-235.
- ~~14~~14 Holland R, Meyers D. Creating champions for health care quality and safety. *Am J Med Qual* 2010;**25**:102–8.
- ~~15~~15 Salanova M, Schaufeli W, Martinez I, Breso E. How obstacles and facilitators predict academic performance: the mediating role of study burnout and engagement. *Anxiety Stress Coping*2010; **23**:53–70.
- ~~16~~16 Roth, G. (2006, May). Distributing leadership practices for lean transformation. *Reflections: The*

1  
2  
3  
4  
5  
6  
7  
8  
9  
10  
11  
12  
13  
14  
15  
16  
17  
18  
19  
20  
21  
22  
23  
24  
25  
26  
27  
28  
29  
30  
31  
32  
33  
34  
35  
36  
37  
38  
39  
40  
41  
42  
43  
44  
45  
46  
47  
48  
49  
50  
51  
52  
53  
54  
55  
56  
57  
58  
59  
60

*SoL Journal*, 7 (2), pp. 15-29.

~~16-17~~ Ehigie BO, Ehigie RI. Applying qualitative methods in organizations: A note for industrial/organizational psychologists. *Qual Rep*2005;**10**:621–38.

~~17-18~~ Lindlof TR, Taylor BC. Qualitative communication research methods, third edition. Thousand Oaks, CA: Sage 2011.

~~18-19~~ Krippendorff, K. (1980). Clustering. In P. R. Monge & J. N. Cappella (Eds.), *Multivariate Techniques in Human Communication Research* (pp. 259–308). New York, NY: Saldana, J. (2013). *The coding manual for qualitative researchers*. Sage, London, p.218.±

~~19-20~~ Pope C, Ziebland S, Mays N. Qualitative research in health care. Analysing qualitative data. *BMJ* 2000;**320**:114–6.

~~20-21~~ Boeije, HR. Analysis in Qualitative Research. London: SAGE Publications Ltd 2010

~~21-22~~ Bahensky JA, Roe J, Bolton R. Lean sigma—will it work for healthcare? *J Healthc Inf Manag* 2005;**19**:39–44.

~~22-23~~ Fillingham D. Can lean save lives? *Leadersh Health Serv* 2007;**20**:231–41.

~~23-24~~ Aherne J. Think lean. *J Nurs Manag* 2007;**13**:13–5.

~~24-25~~ Massey L, Williams S. CANDO: implementing change in an NHS Trust. *Int J Public Sect Manag* 2005;**18**:330–49.

~~25-26~~ Nelson-Peterson D, Leppa C. Creating an environment for caring using lean principles of the Virginia Mason Production System. *J Nurs Adm* 2007;**37**:287–93.

~~26-27~~ Kotter JR. Leading change: Why transformation efforts fail. *Harv Bus Rev* 2007;**85**: 96–103.

~~27-28~~ Womack JP, Jones DT. Beyond Toyota: How to root out waste and pursue perfection. *Harv Bus Rev* 1996;**74**:140–58.

~~28-29~~ Dickson EW, Singh S, Cheung DS, et al. Application of lean manufacturing techniques in the emergency department. *J Emerg Med* 2008;**37**:177–182.

~~29-30~~ Kaplan G, Patterson S. Seeking perfection in healthcare. A case study in adopting Toyota Production System methods. *Healthc Exec* 2008;**23**:16–21.

~~30-31~~ Jimmerson C, Weber D, Sobek D. Reducing waste and errors: piloting lean principles at IHC. *J Qual Saf* 2005;**31**:249–57.

~~31-32~~ Manos A, Sattler M, Alukal G. Make healthcare lean. *Qual Prog* 2006;**39**:24.

~~32-33~~ Aherne J. Think lean. *J Nurs Manag* 2007;**13**:13–5.

~~33-34~~ Esain A, Williams S, Massey L. Combining planned and emergent change in a healthcare lean transformation. *Public Money Manage* 2008;**28**:21–6.

~~34-35~~ Panchak P. Lean health care? It works! *Ind Week* 2003;**252**:34–40.

~~35-36~~ Persoon T, Zaleski S, Frerichs J. Improving preanalytic processes using the principles of lean production (Toyota Production System). *Am J Clin Pathol* 2006;**125**:16–25.

~~36-37~~ Achanga P, Shehab E, Roy R, et al. Critical success factors for lean implementation within SMEs. *Journal of Manufacturing Technology Management* 2006;**17**:460–71.

Formatted: Font: English (U.S.)

1  
2  
3  
4  
5  
6  
7  
8  
9  
10  
11  
12  
13  
14  
15  
16  
17  
18  
19  
20  
21  
22  
23  
24  
25  
26  
27  
28  
29  
30  
31  
32  
33  
34  
35  
36  
37  
38  
39  
40  
41  
42  
43  
44  
45  
46  
47  
48  
49  
50  
51  
52  
53  
54  
55  
56  
57  
58  
59  
60

37-38 Martinez Leon HC, Temblador Perez MDC, Farris JA, et al. Integrating Six Sigma tools using team-learning processes. *International Journal of Lean Six Sigma* 2010;**3**:133–156.

~~38 Czabke J, Hansen EN, Doolen TL. A multisite field study of lean thinking in US and German secondary wood products manufacturers. *Forest Prod J* 2008;**58**:77–85.~~

39 Endsley S, Magill MK, Godfrey MM. Creating a lean practice. *FamPractManag* 2006;**13**:34–8.

40 Spear SJ. Fixing health care from the inside: teaching residents to heal broken delivery processes as they heal sick patients. *Acad Med* 2006;**81**:144–9.

41 Weick, KE. Sensemaking in Organizations, Thousand Oaks, California: SAGE Publications Inc 1995

42 Czarniawska B. Emerging Institutions: Pyramids or Anthills? *Organization Studies* 2009;**30**:423-441.

1  
2  
3  
4  
5  
6  
7  
8  
9  
10  
11  
12  
13  
14  
15  
16  
17  
18  
19  
20  
21  
22  
23  
24  
25  
26  
27  
28  
29  
30  
31  
32  
33  
34  
35  
36  
37  
38  
39  
40  
41  
42  
43  
44  
45  
46  
47  
48  
49  
50  
51  
52  
53  
54  
55  
56  
57  
58  
59  
60

Figure 1. Overview of the envisaged and executed action points.

For peer review only

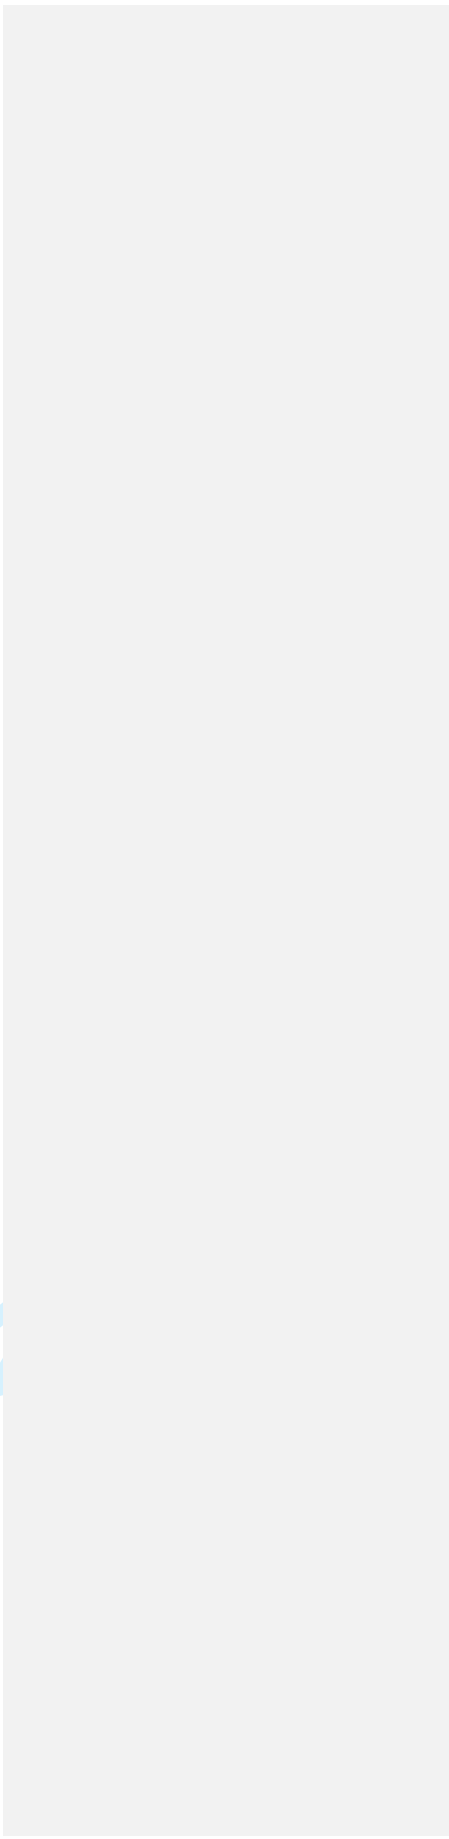

Supplement: bmjopen-2013-003605.draft_revisions.pdf [file bmjopen-2013-003605.draft_revisions.pdf]
